# Supplementary material
Source: publisher figshare collection journal article supplement (https://acs.figshare.com/ndownloader/files/4093561)

## Supporting Information

# Synthesis of Tetramic Acid Derivatives via Intramolecular $\text{sp}^3$ C–H Amination Mediated by Hypervalent Iodine(III) Reagents/Brønsted Acids

Lujia Mao, Yan Li\*, Tao Xiong, Kai Sun and Qian Zhang\*

Department of Chemistry, Northeast Normal University, Changchun, 130024, China

Email: [liy078@nenu.edu.cn](mailto:liy078@nenu.edu.cn); [zhangq651@nenu.edu.cn](mailto:zhangq651@nenu.edu.cn)

## Table of Contents

|                                                                               |       |
|-------------------------------------------------------------------------------|-------|
| $^1\text{H}$ NMR and $^{13}\text{C}$ NMR spectra copies for compounds 2 ..... | S2–35 |
|-------------------------------------------------------------------------------|-------|

# <sup>1</sup>H NMR and <sup>13</sup>C NMR spectra copies for compounds 2

## Compound 2a

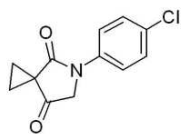

STANDARD PROTON PARAMETERS  
 Archive directory: /export/home/ouyy/vnmrsws/data  
 Sample directory:  
 Pulse Sequence: s2pul  
 Solvent: CDCl3  
 Ambient temperature  
 File: p167  
 INOVA-500 "HREUS00"  
 Relax. delay 1.000 sec  
 Pulse 45.0 degrees  
 Acq. time 1.832 sec  
 Width 899.8 Hz  
 Observed F1 (MHz)  
 OBSERVE H1 499.8025895 MHz  
 DATA PROCESSING  
 FT size 65536  
 Total time 0 min, 23 sec

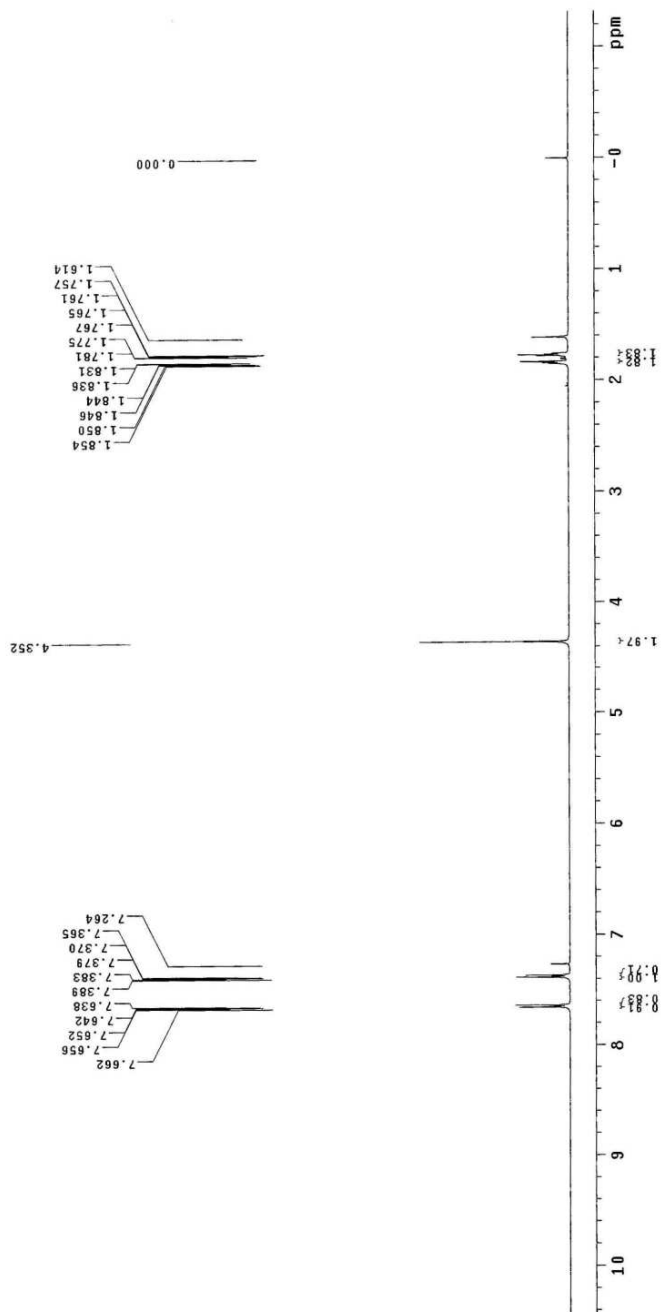

# Compound 2a

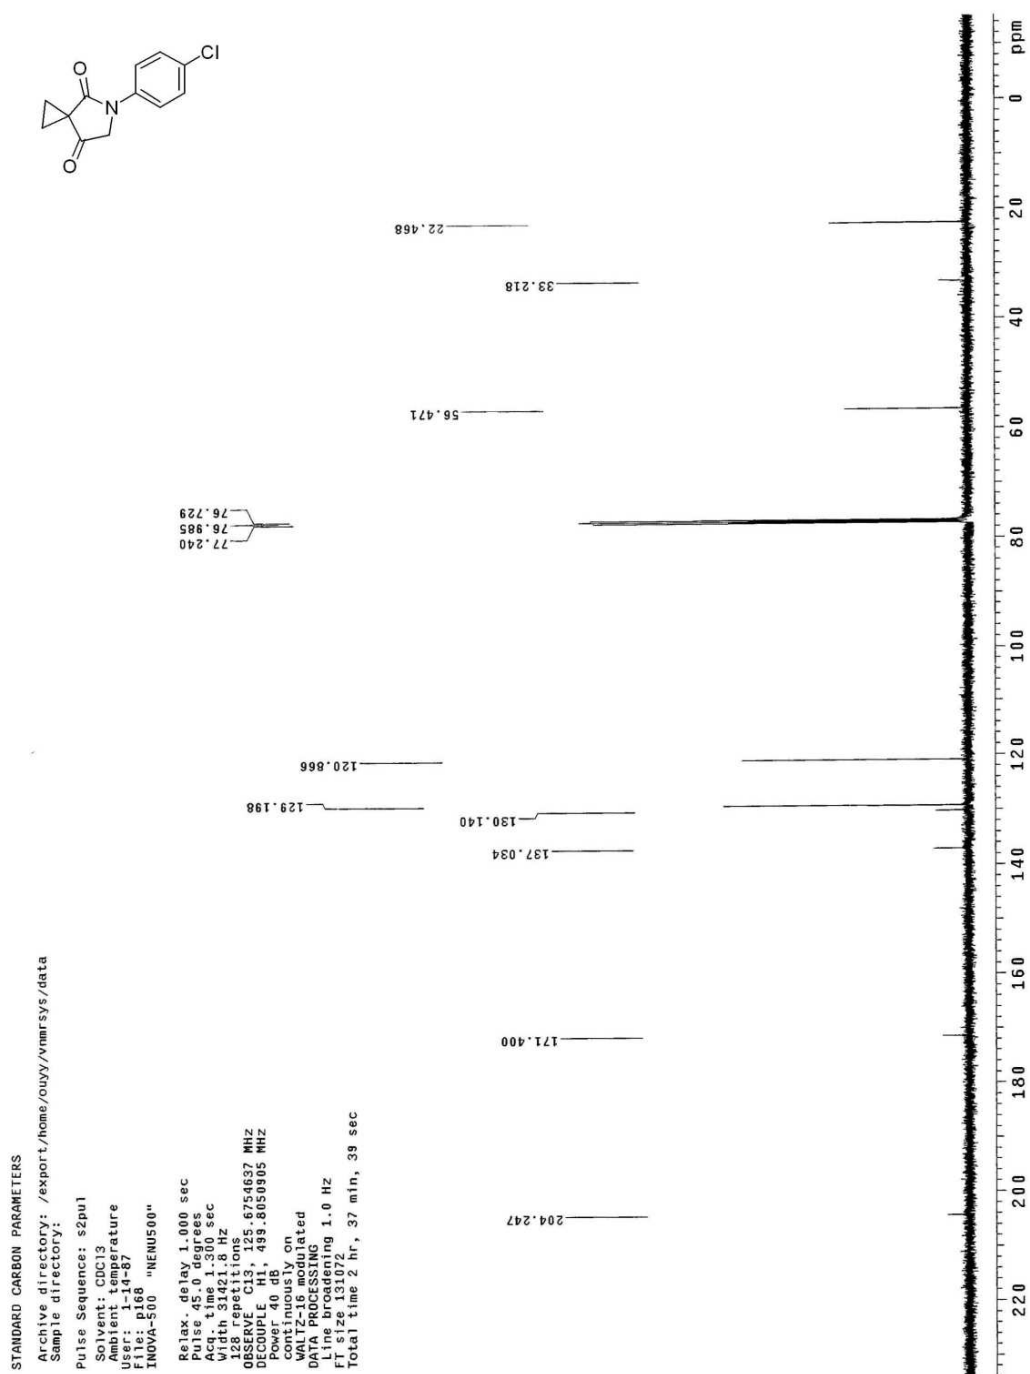

# Compound 2b

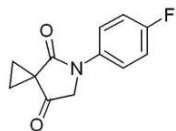

STANDARD PROTON PARAMETERS  
 Archive directory: /export/home/ouys/vnmr/sys/data  
 Sample directory:  
 Pulse Sequence: szpu1  
 Solvent: CDCl3  
 Ambient temperature  
 F2 size 65536  
 INOVA-500 "MNU500"  
 Relax. delay 1.000 sec  
 Pulse 45.0 degrees  
 Acq. time 1.882 sec  
 F1 size 65536  
 F2 size 65536  
 8 F2 data files  
 OBSERVE H1, 499.8025903 MHz  
 DATA PROCESSING  
 FT size 65536  
 Total time 0 min, 23 sec

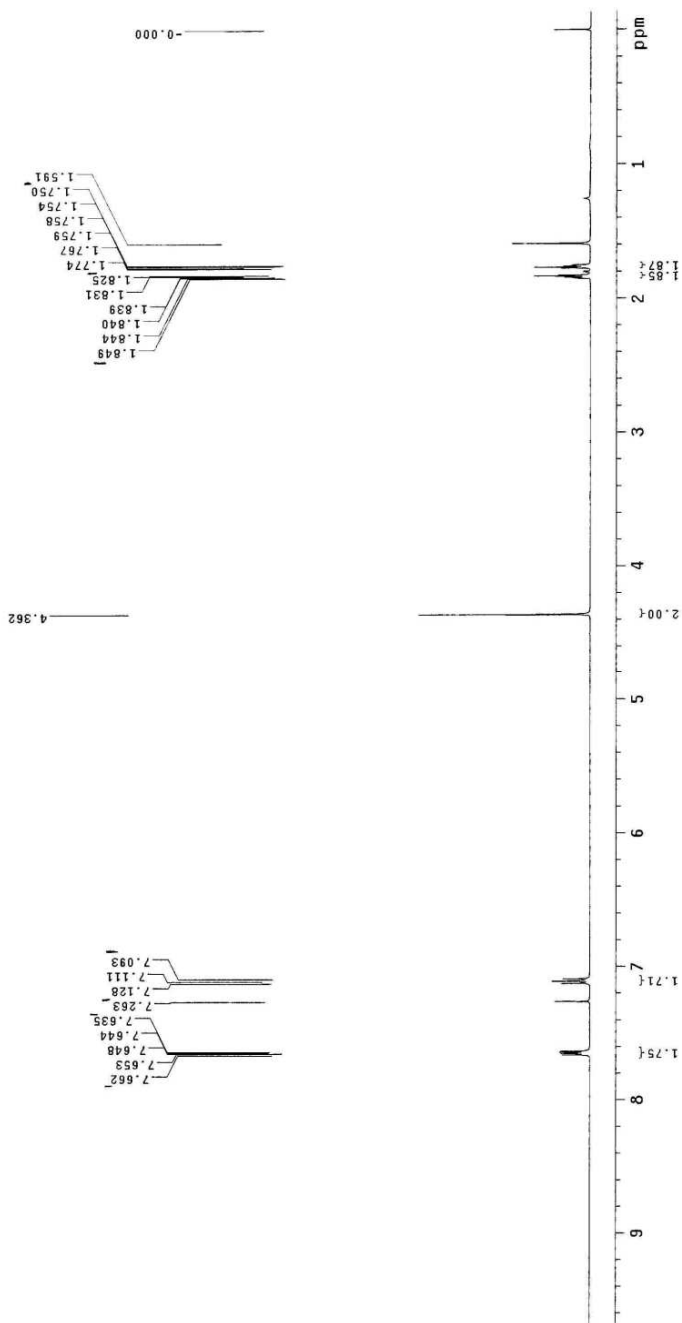

# Compound 2b

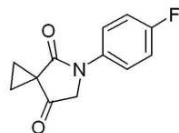

## STANDARD CARBON PARAMETERS

Archive directory: /export/home/ouyy/vnmrsys/data  
Sample directory:

Pulse Sequence: s2pul1

Solvent: CDCl<sub>3</sub>

Ambient temperature

User: 1-14-87

File: p182

INOVA-500 "MENU500"

Relax. delay 0.500 sec

Power 40 dB

Acq. time 1.300 sec

Width 31421.8 Hz

5632 repetitions

Observed C13, 125.6754608 MHz

Observed H1, 499.8050305 MHz

Power 40 dB

continuously on

WALTZ-16 modulated

DATA PROCESSING

Time acquisition 1.0 Hz

FT size 131072

Total time 3 hr, 56 sec

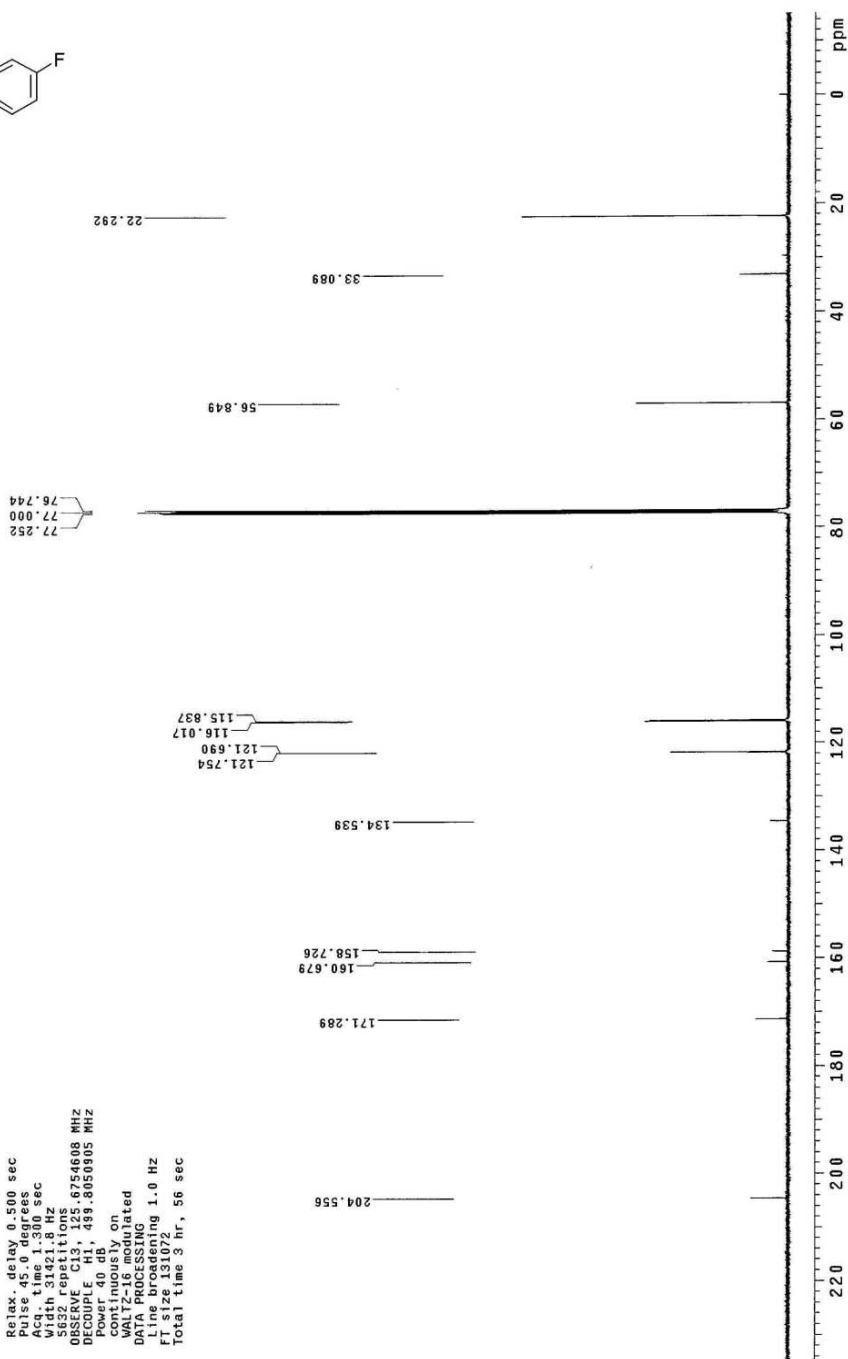

# Compound 2c

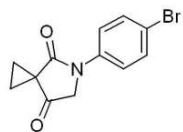

## STANDARD PROTON PARAMETERS

Archive directory: /export/home/ouy/vnmr/sys/data  
Sample directory:

Pulse Sequence: s2pu1

Solvent: CDCl<sub>3</sub>

Ambient temperature

File: k323

INOVA-500 "NMRUS00"

Relax. delay 1.000 sec

Pulse 45.0 deg

Acq. time 1.892 sec

Width 8440.6 Hz

Frequency 500.136 MHz

Observed 499.5025914 MHz

DATA PROCESSING

FT size 65536

Total time 0 min, 23 sec

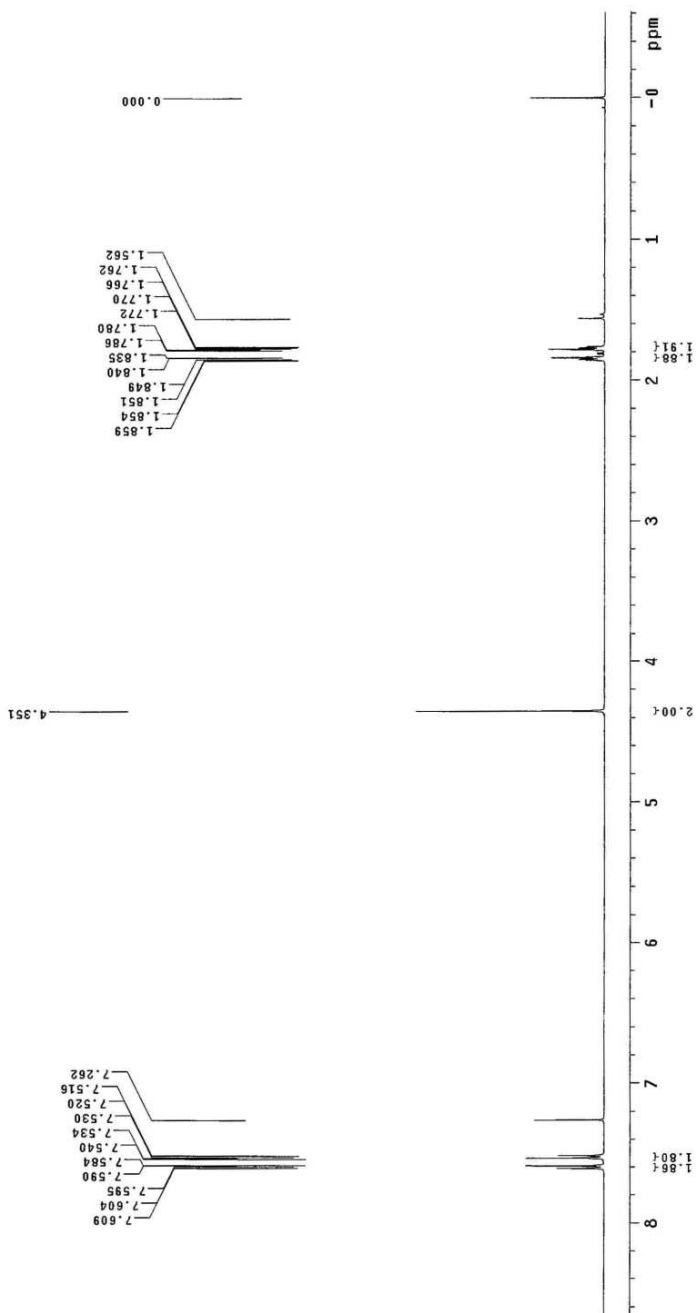

# Compound 2c

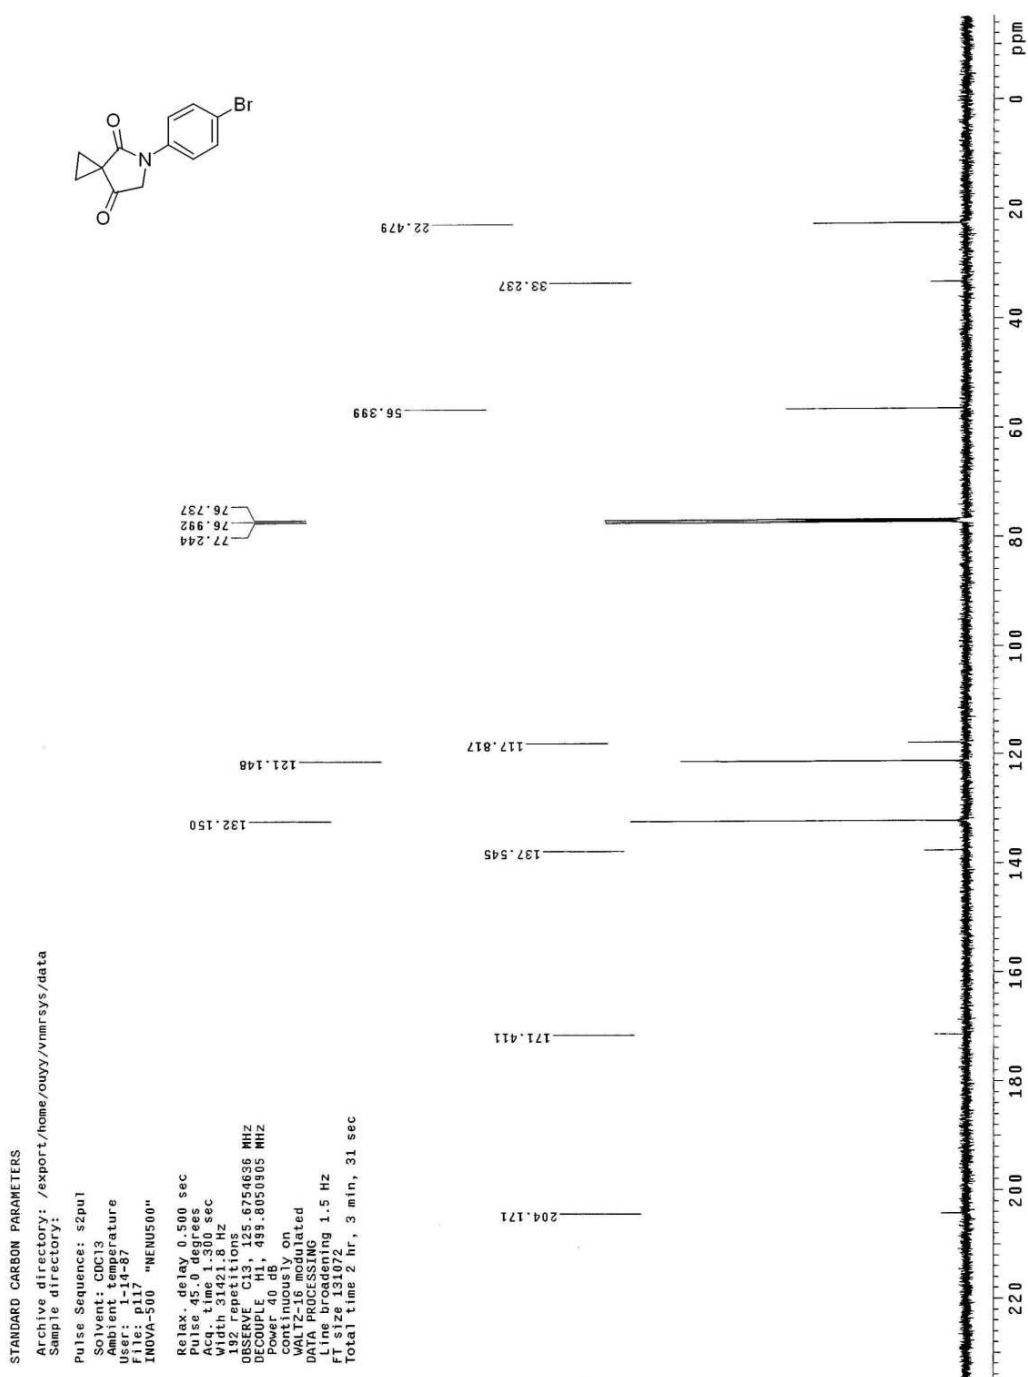

# Compound 2d

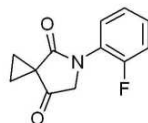

STANDARD PROTON PARAMETERS  
 Archive directory: /export/home/duffy/vnmr/sys/data  
 Sample directory:  
 Pulse Sequence: s2pul1  
 Solvent: CDCl3  
 Ambient temperature  
 F1 size 65536  
 INOVA-500 "HMENU500"  
 Relax. delay 1.000 sec  
 Pulse 45.0 degrees  
 Acq. time 1.892 sec  
 Width 31500 Hz  
 SFO 500.136 MHz  
 8 repetitions  
 OBSERVE H1, 499.8025888 MHz  
 DATA PROCESSING  
 F1 size 65536  
 Total time 0 min, 23 sec

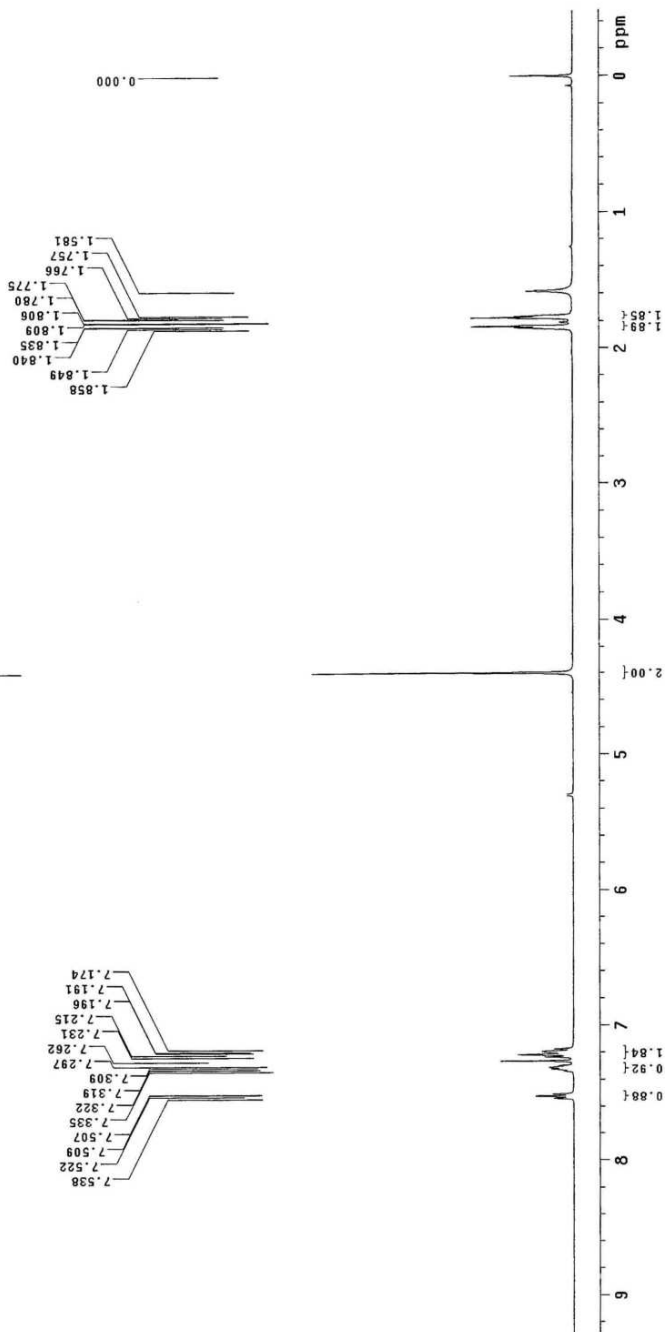

# Compound 2d

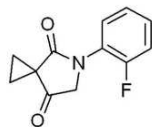

## STANDARD CARBON PARAMETERS

Archive directory: /export/home/ouy/vnmr/sys/data

Sample directory:

Pulse Sequence: s2pu1

Solvent: cdcl3

Acq. temperature

File: e326

INOVA-500 "HENU500"

Relax. delay 0.500 sec

Pulse 45.0 degrees

Acq. time 0.500 sec

Width 31421.8 Hz

4928 repetitions

OBSERVE C13, 125.6754642 MHz

DECOUPLE H1, 499.8050905 MHz

Power 22.00 dB

Continuously on

WALTZ-16 modulated

DATA PROCESSING

Line broadening 1.5 Hz

File size 131072

Total time 3 hr, 56 sec

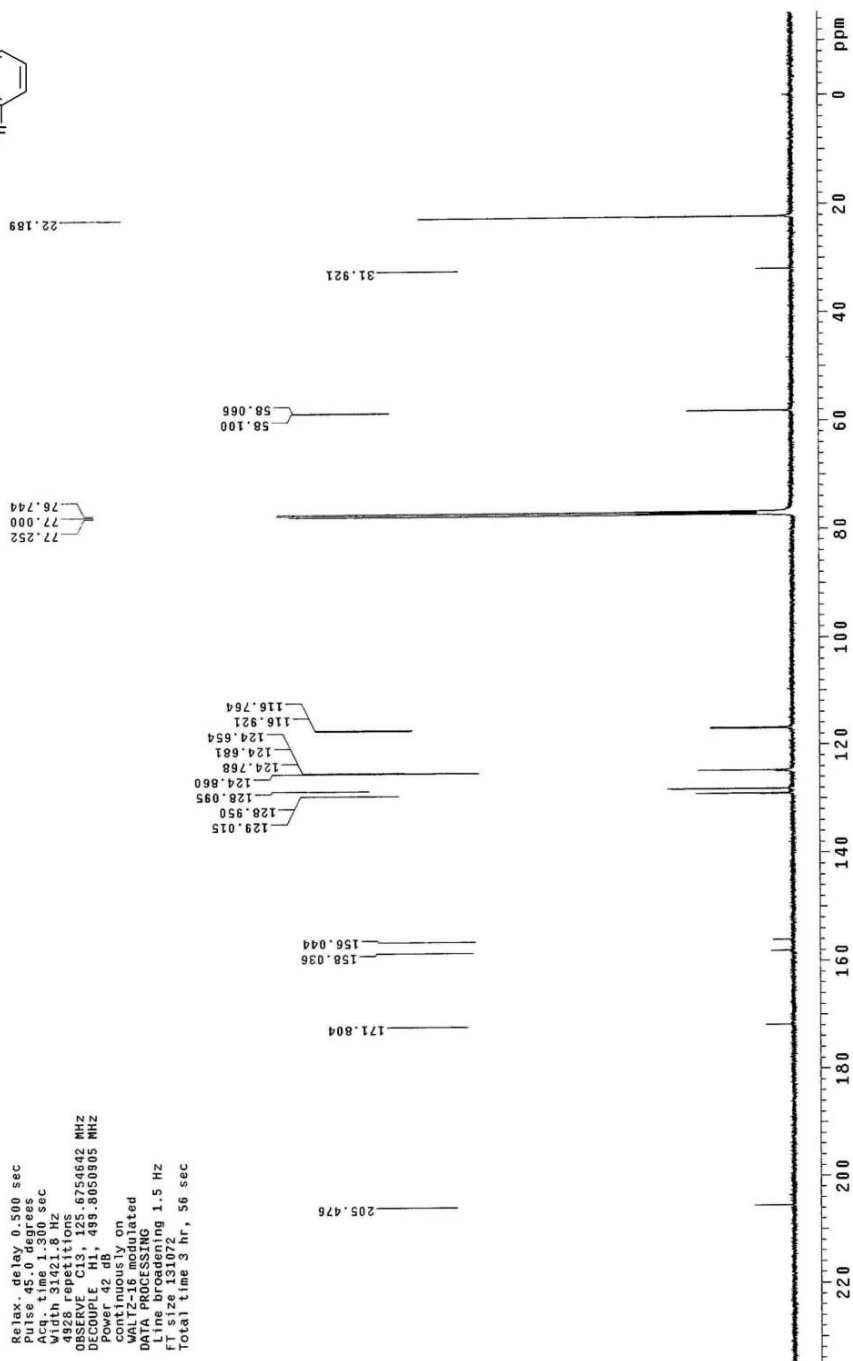

# Compound 2e

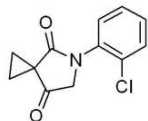

STANDARD PROTON PARAMETERS  
 Archive directory: /export/home/ouy/vnmr/sy/data  
 Sample directory:  
 Pulse Sequence: szpu1  
 Solvent: CDCl3  
 Ambient temperature  
 F1 size 65536  
 INOVA-500 "NMR500"  
 Relax. delay 1.000 sec  
 Pulse 45.0 degrees  
 Acq. time 1.892 sec  
 F1 size 65536 Hz  
 8 repetitions  
 OBSERVE H1, 499.8025846 MHz  
 DATA PROCESSING  
 F1 size 65536  
 Total time 0 min, 23 sec

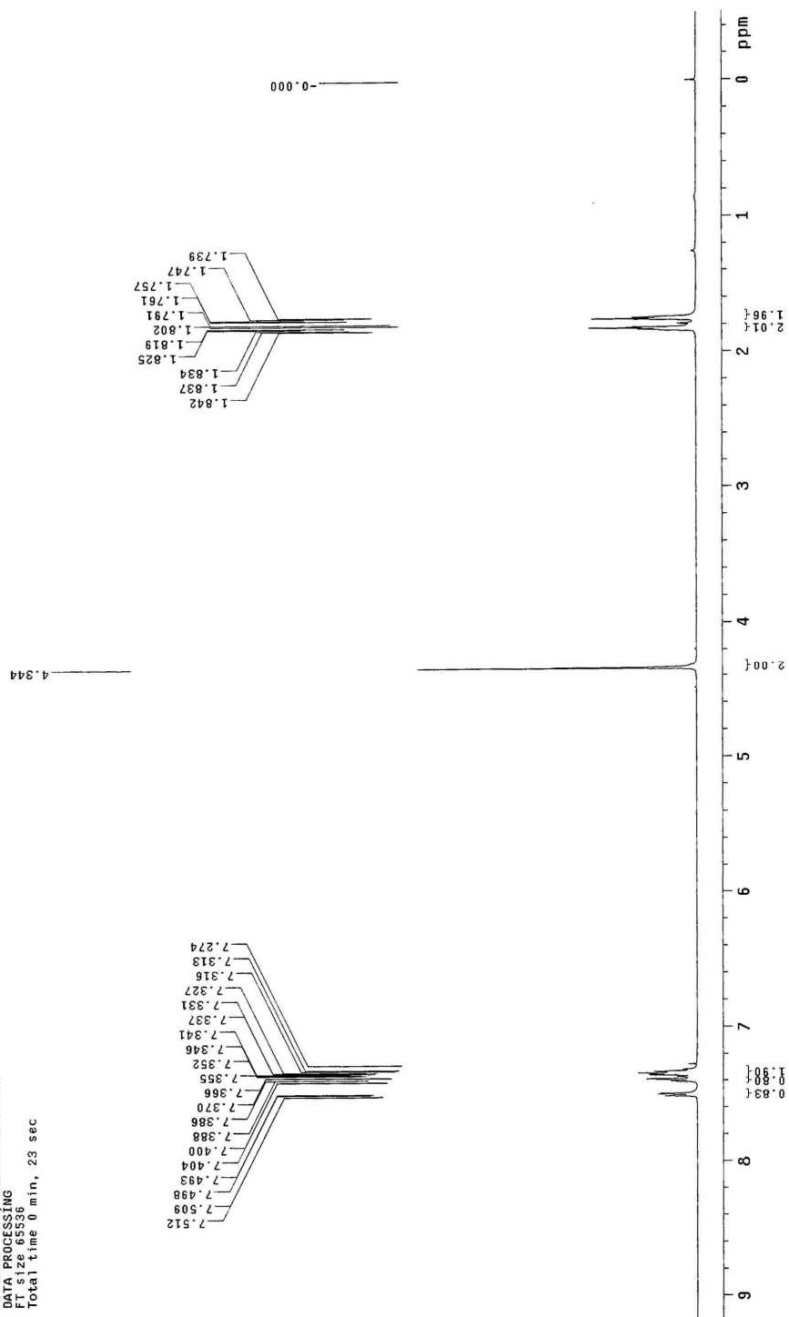

# Compound 2e

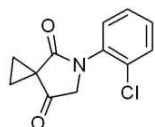

## STANDARD CARBON PARAMETERS

Archive directory: /export/home/ouyy/vnmr/sys/data  
Sample directory:

Pulse Sequence: s2pul

Solvent: CDCl<sub>3</sub>

Ambient temperature

User: 1-14-87

File: 1-14-87

INOVA-500 "MENV500"

Relax. delay 0.500 sec

Pulse 45.0 degrees

Acq. time 1.300 sec

Width 31421.8 Hz

15 Spectral tone

OBSERVE C13, 125.6754737 MHz

DECOUPLE H1, 499.8050805 MHz

Power 40 dB

continuously on

Antenna cooled

DATA PROCESSING

Line broadening 1.5 Hz

FT size 131072

Total time 2 hr, 3 min, 31 sec

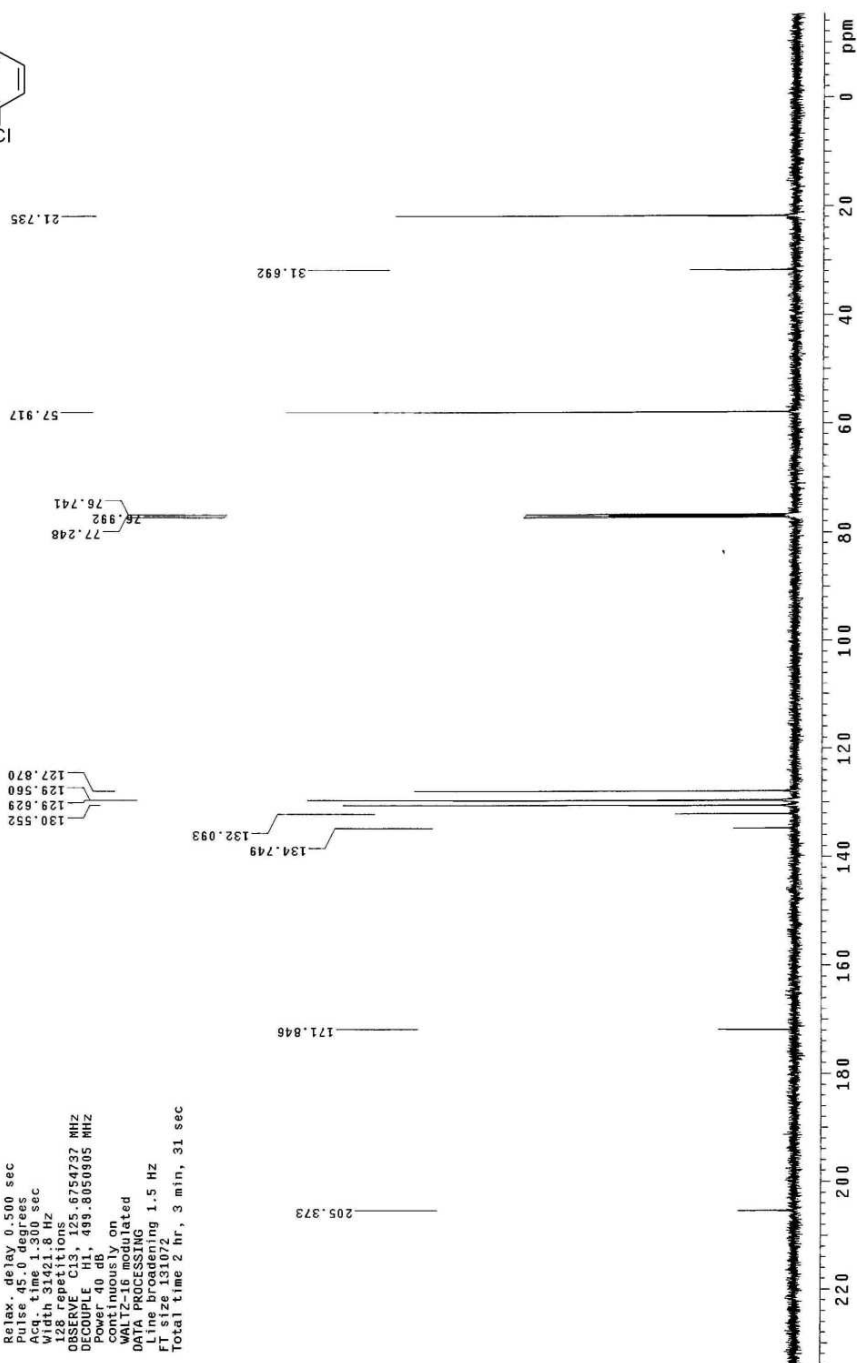

# Compound 2f

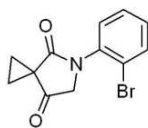

STANDARD PROTON PARAMETERS  
 Archive directory: /export/home/ouvy/vnmr/sys/data  
 Sample directory:  
 Pulse Sequence: s2pu1  
 Solvent: CDCl3  
 Acquisition temperature  
 File: K330 "NENU500"  
 INOVA-500 "NENU500"  
 Relax. delay 1.000 sec  
 Pulse 45.0 degrees  
 Acc. time 2.000 sec  
 Width 8040.6 Hz  
 8 repetitions  
 OBSERVE H1, 499.8025907 MHz  
 DATA PROCESSING  
 Processing time 0.00 sec  
 Total time 0 min, 23 sec

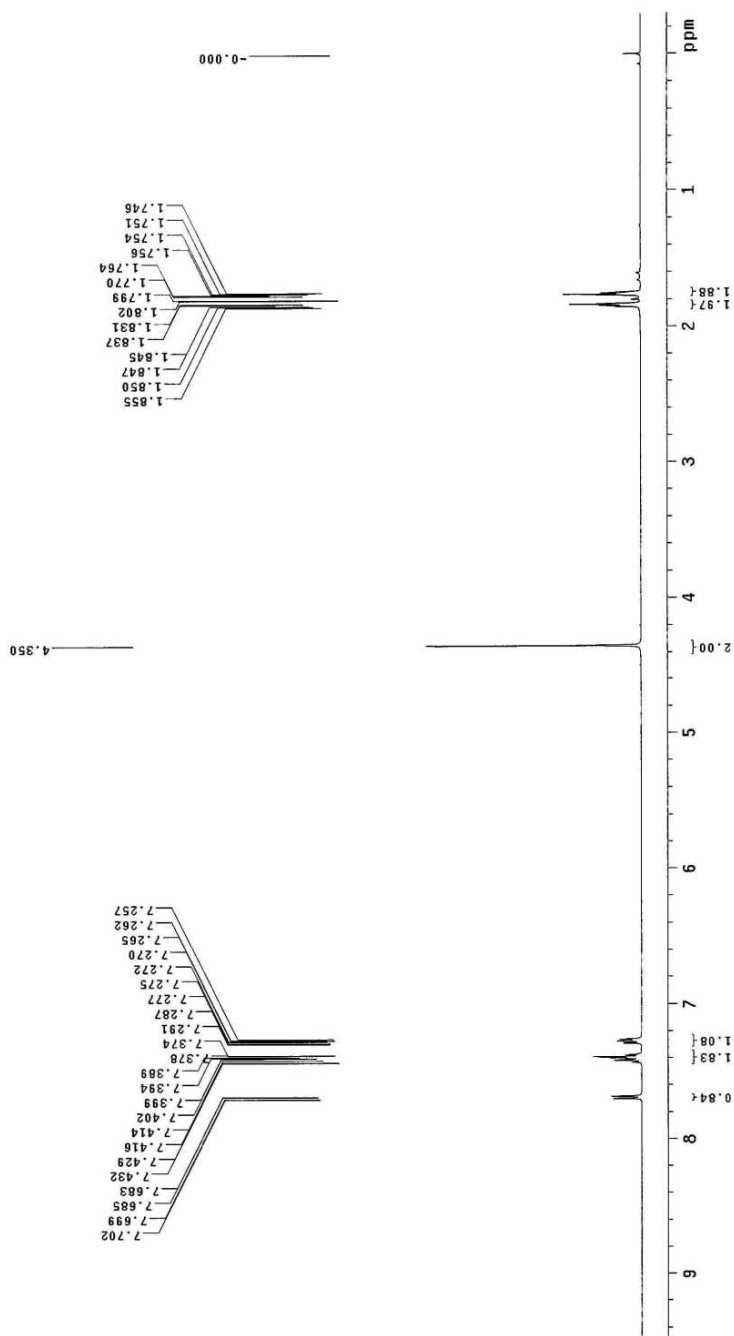

# Compound 2f

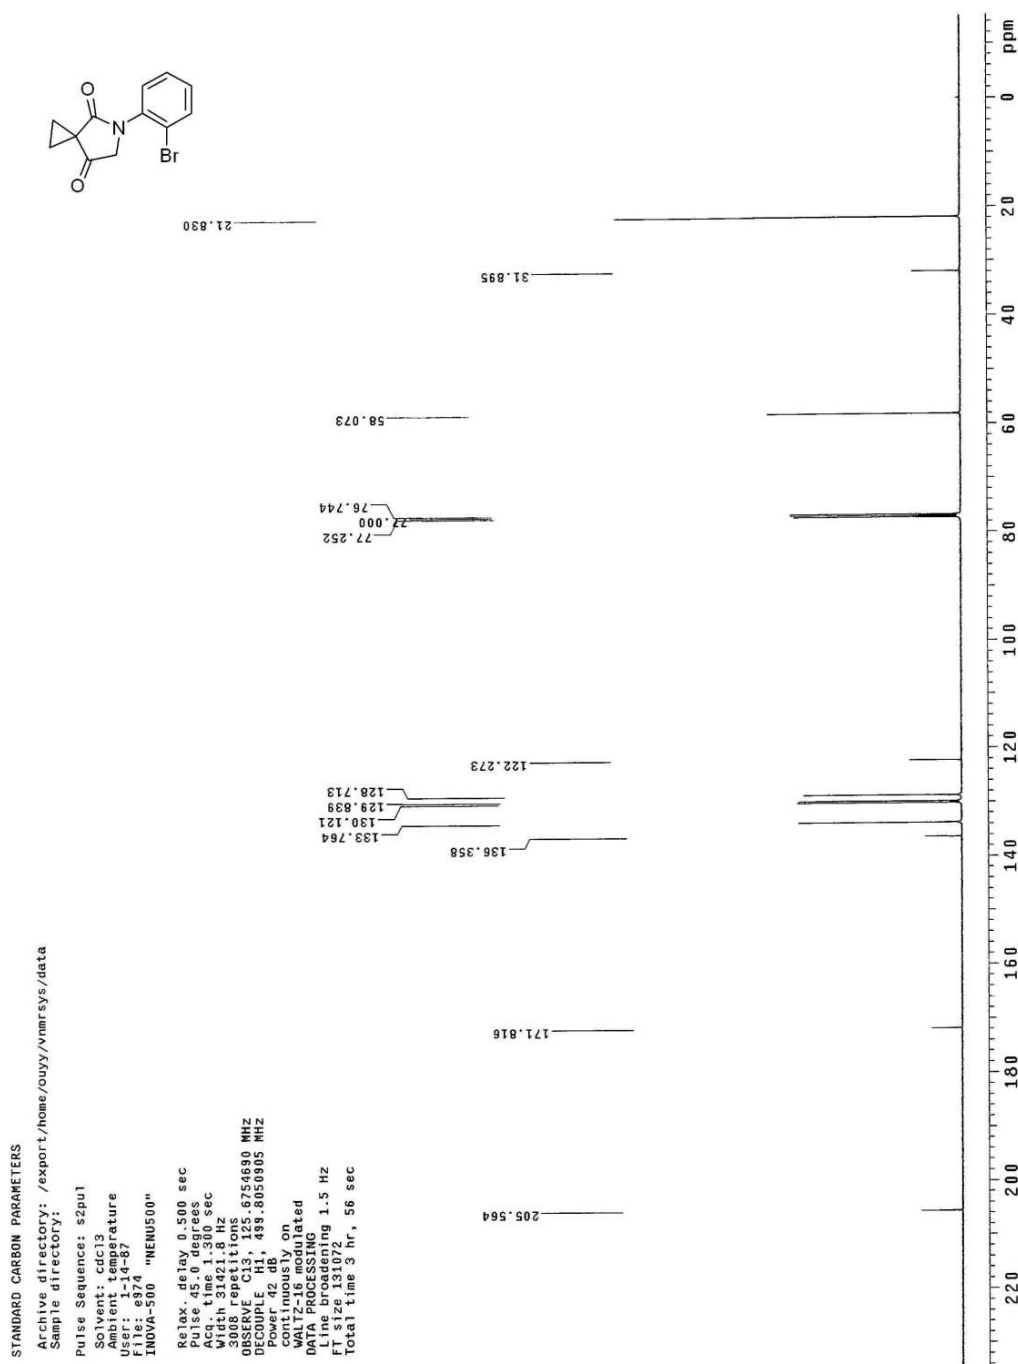

# Compound 2g

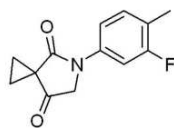

## STANDARD PROTON PARAMETERS

Archive directory: /export/home/ouyy/vnmrsvs/data

Sample directory:

Pulse Sequence: s2pu1

Solvent: CDCl3

Ambient temperature

File: C336

INQA-S00 "NMRUS00"

Relax. delay 1.000 sec

Pulse 45.0 degrees

Acq. time 1.852 sec

Wdth 8102.4 Hz

Wdth 8102.4 Hz

OBSERVE H1 499.3025906 MHz

DATA PROCESSING

FT size 65536

Total time 0 min, 23 sec

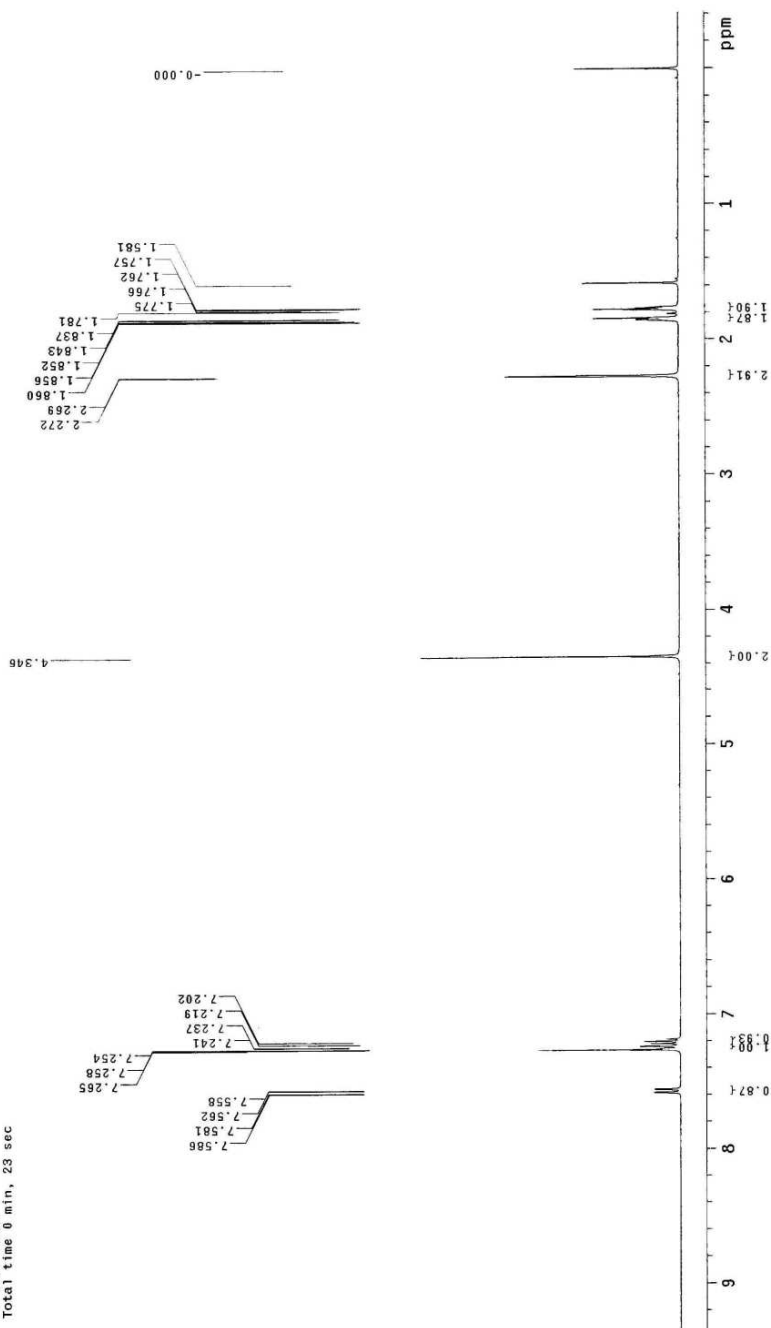

# Compound 2g

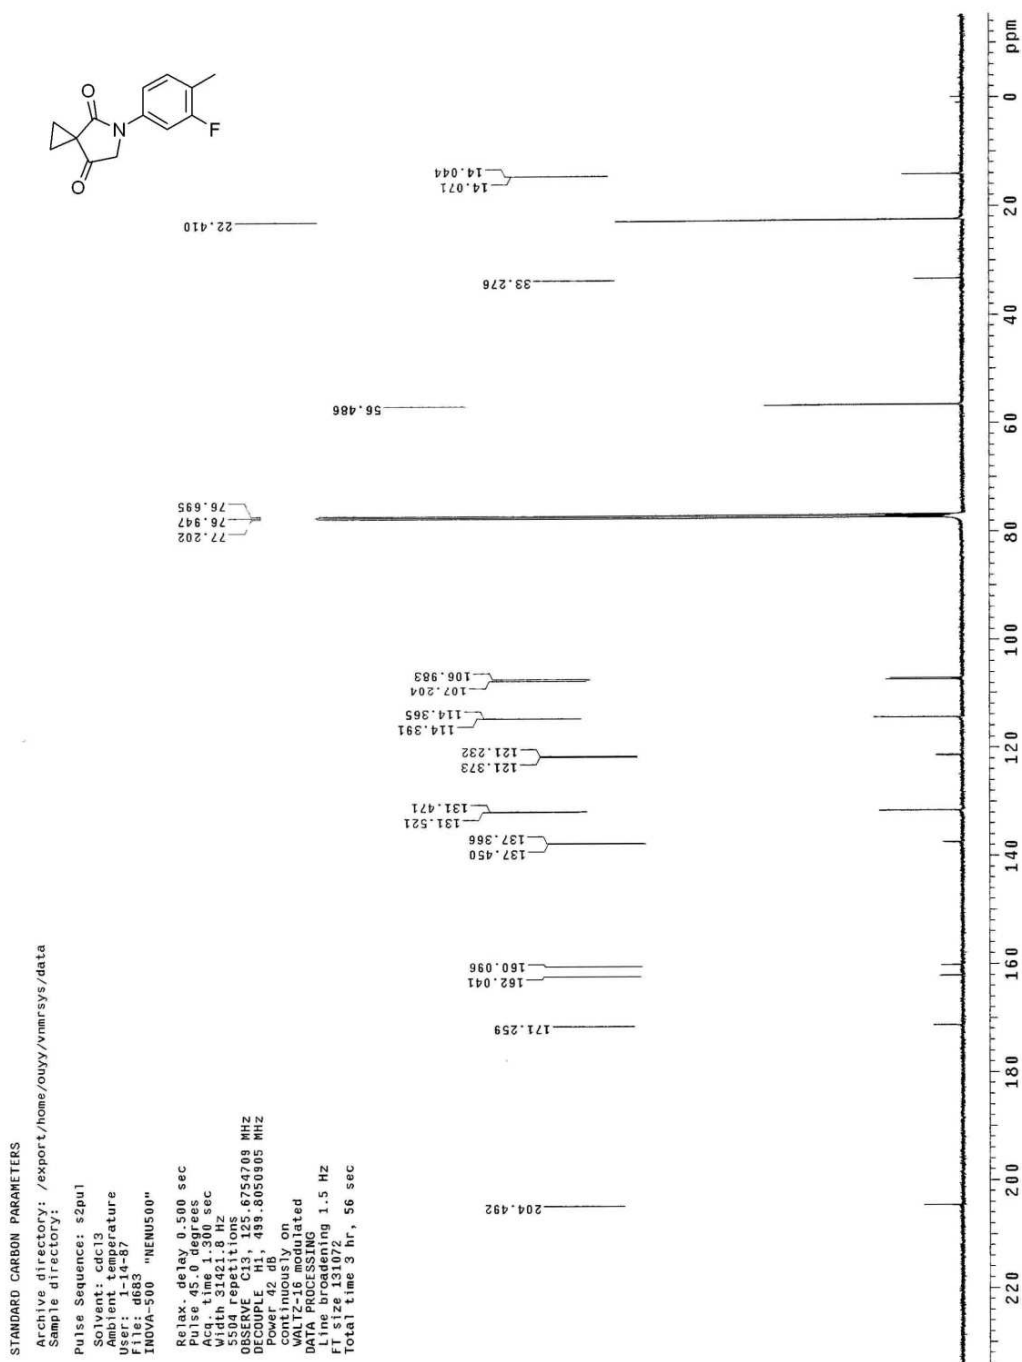

# Compound 2h

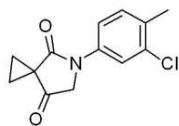

STANDARD PROTON PARAMETERS  
 Archive directory: /export/home/ouyy/vmarsys/data  
 Sample directory:  
 Pulse Sequence: szpul  
 Solvent: CDCl3  
 Ambient temperature  
 File: k328  
 INOVA-500 "HENU500"  
 Relax. delay 1.000 sec  
 Pulse 45.0 degrees  
 Acq. time 1.892 sec  
 Width 8440.6 Hz  
 Spectral width 10000.0 Hz  
 OBSERVE H 499.8025919 MHz  
 DATA PROCESSING  
 FT size 65536  
 Total time 0 min, 23 sec

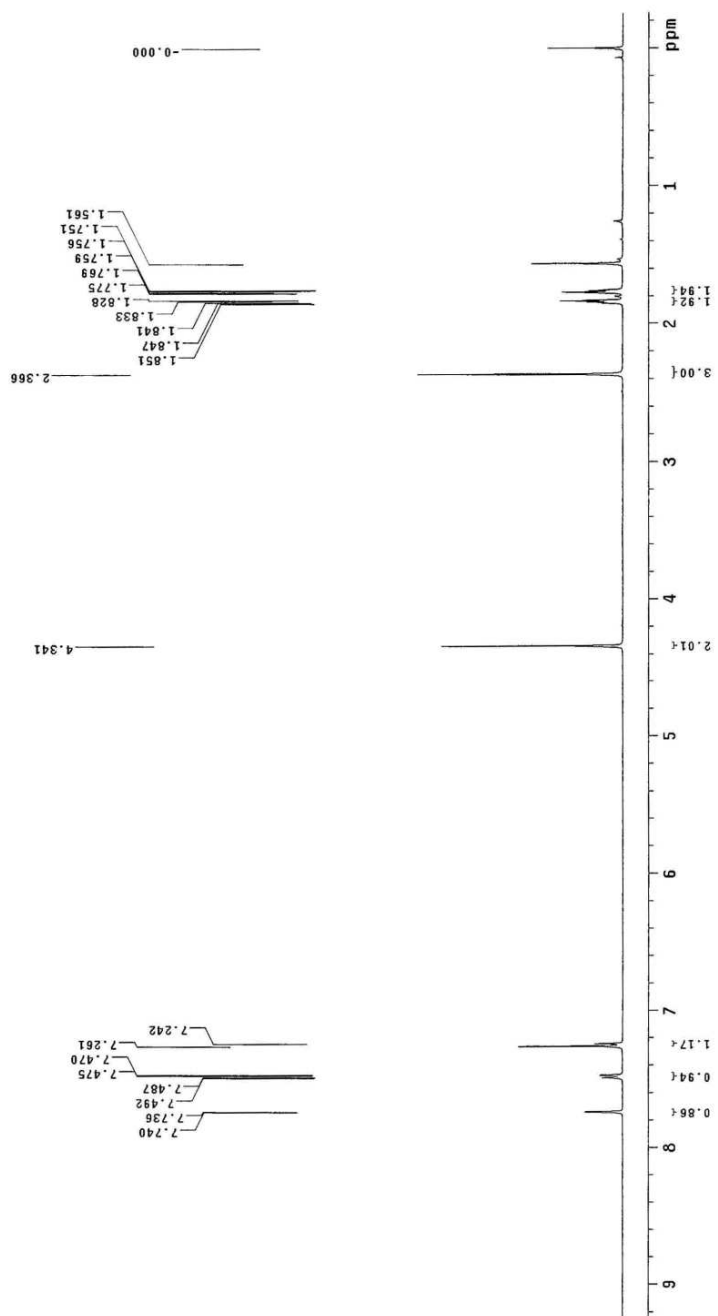

# Compound 2h

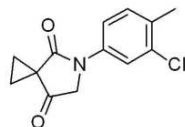

## STANDARD CARBON PARAMETERS

Archive directory: /export/home/ouy/vnmrsys/data

Sample directory:

Pulse Sequence: s2pu1

Solvent: cdcl3

Ambient temperature

User: i-14-87

File: d684

INOVA-500 "NENU500"

Relax. delay 0.500 sec

Pulse 45.0 degrees

Acq. time 1.300 sec

Width 31421.8 Hz

4352 repetitions

DECUPLE H1, 489.8050905 MHz

Power 42 dB

continuously on

WALTZ-16 modulated

DMF-PCSS100

Time broadening 1.5 Hz

FT size 131072

Total time 3 hr, 56 sec

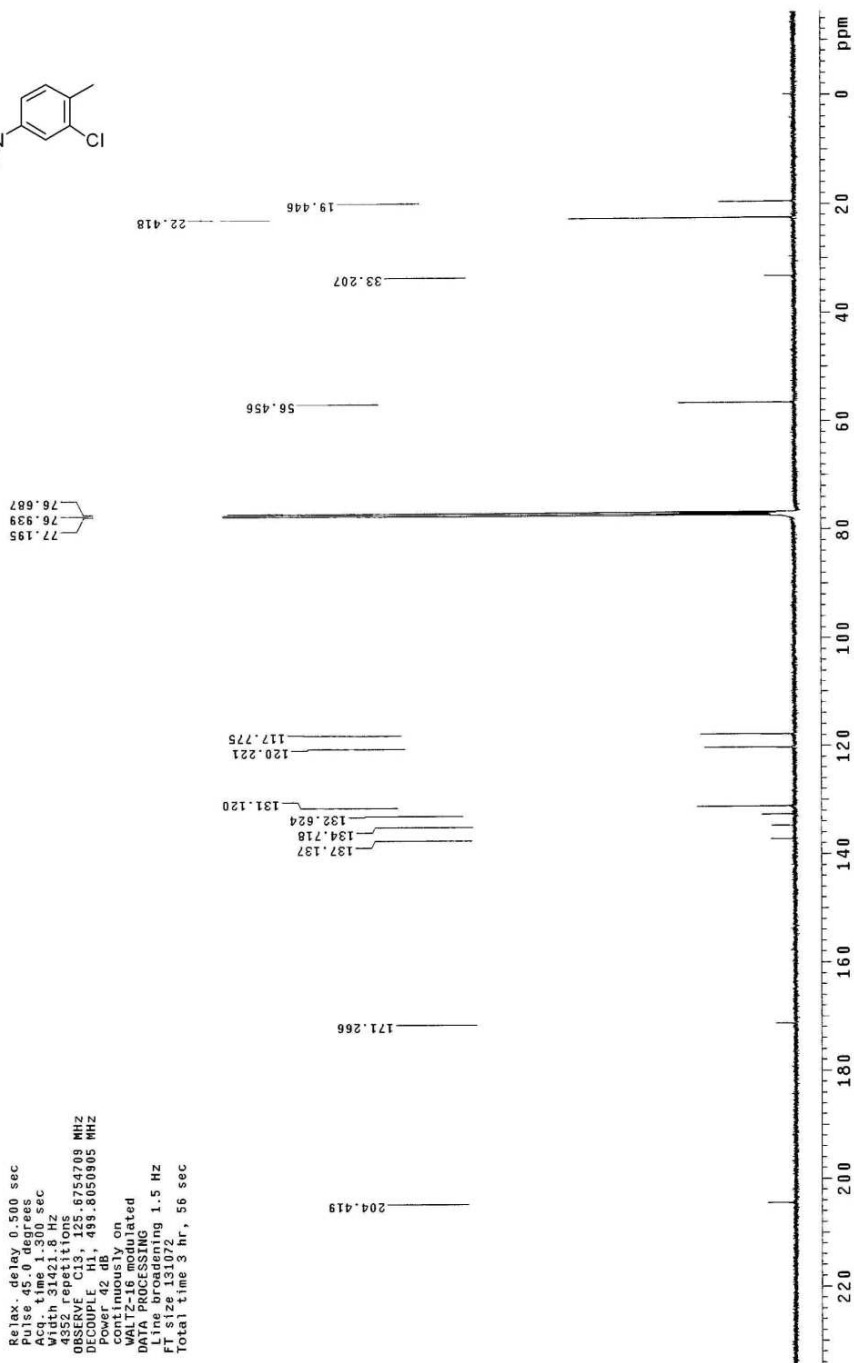

<sup>1</sup>H NMR spectrum of 1,2,3,4,5-pentachlorobenzene in CDCl<sub>3</sub>. The spectrum shows two main multiplets. The aromatic region (7.200–7.693 ppm) has an integration of 2.004. The aliphatic region (1.605–1.855 ppm) has an integration of 9.386. Solvent peaks for CDCl<sub>3</sub> are visible at 7.26 and 1.76 ppm.

| Chemical Shift (ppm) | Integration |
|----------------------|-------------|
| 7.200 – 7.693        | 2.004       |
| 1.605 – 1.855        | 9.386       |

# Compound 2i

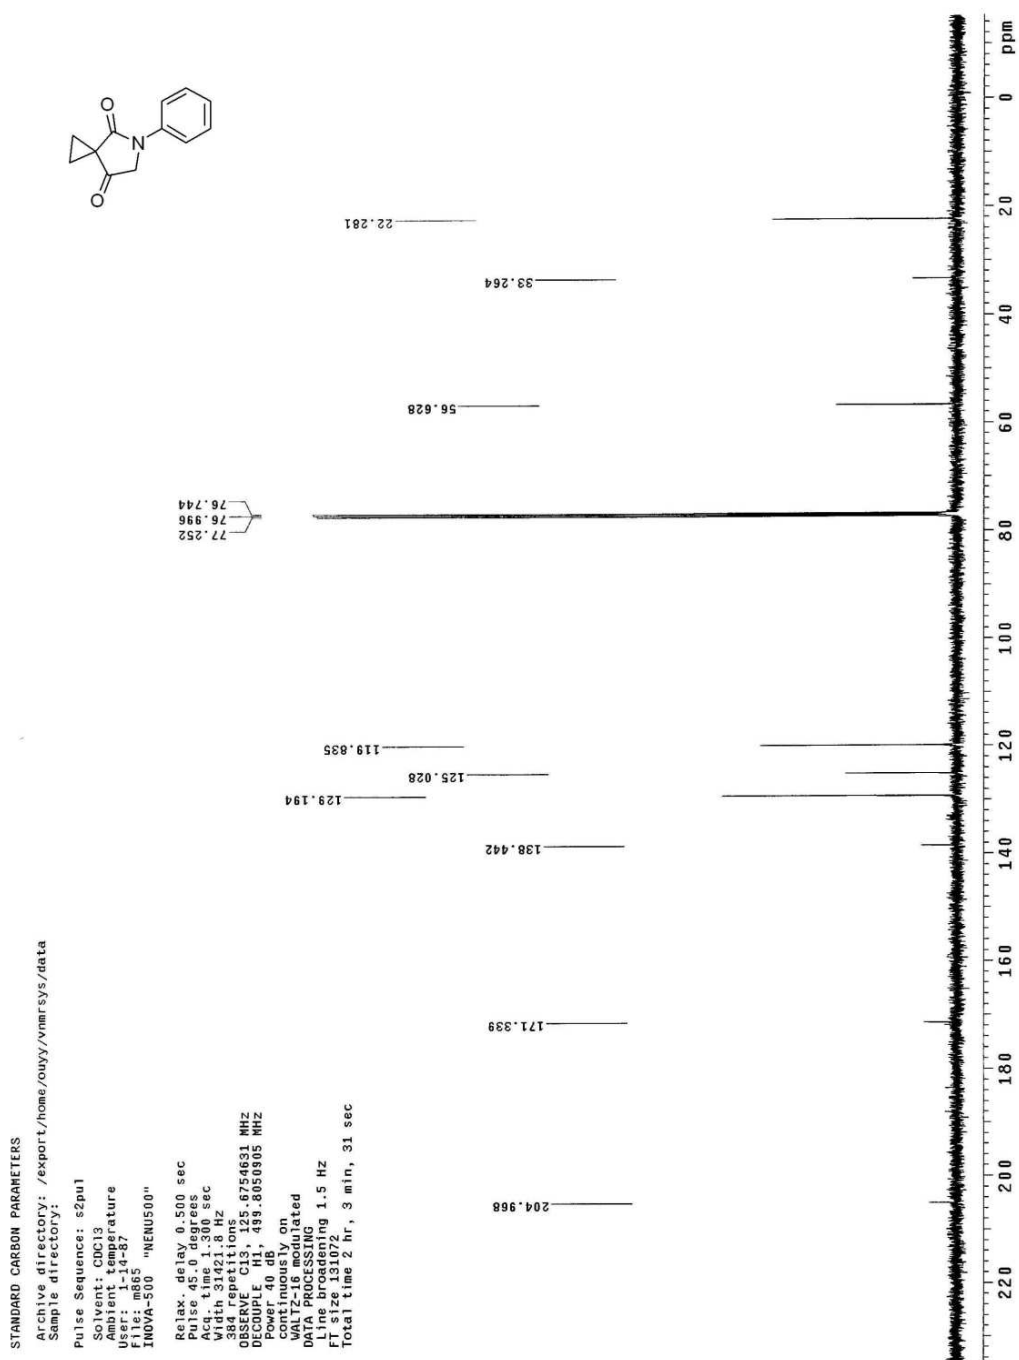

# Compound 2j

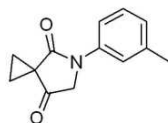

STANDARD PROTON PARAMETERS  
 Archive directory: /export/home/ouyy/vnmrsys/data  
 Sample directory:  
 Pulse Sequence: s2pul1  
 Solvent: CDCl3  
 Ambient temperature  
 File: f450  
 INOVA-500 "NEWUS00"  
 Relax. delay: 1.000 sec  
 Pulse: 45.0 degrees  
 Acq. time: 1.892 sec  
 Width: 3201.7 Hz  
 Spectral width: 3201.7 Hz  
 Observed: 400.136 MHz  
 Reference: TMS  
 DATA PROCESSING  
 FT size: 65536  
 Total time: 0 min, 23 sec

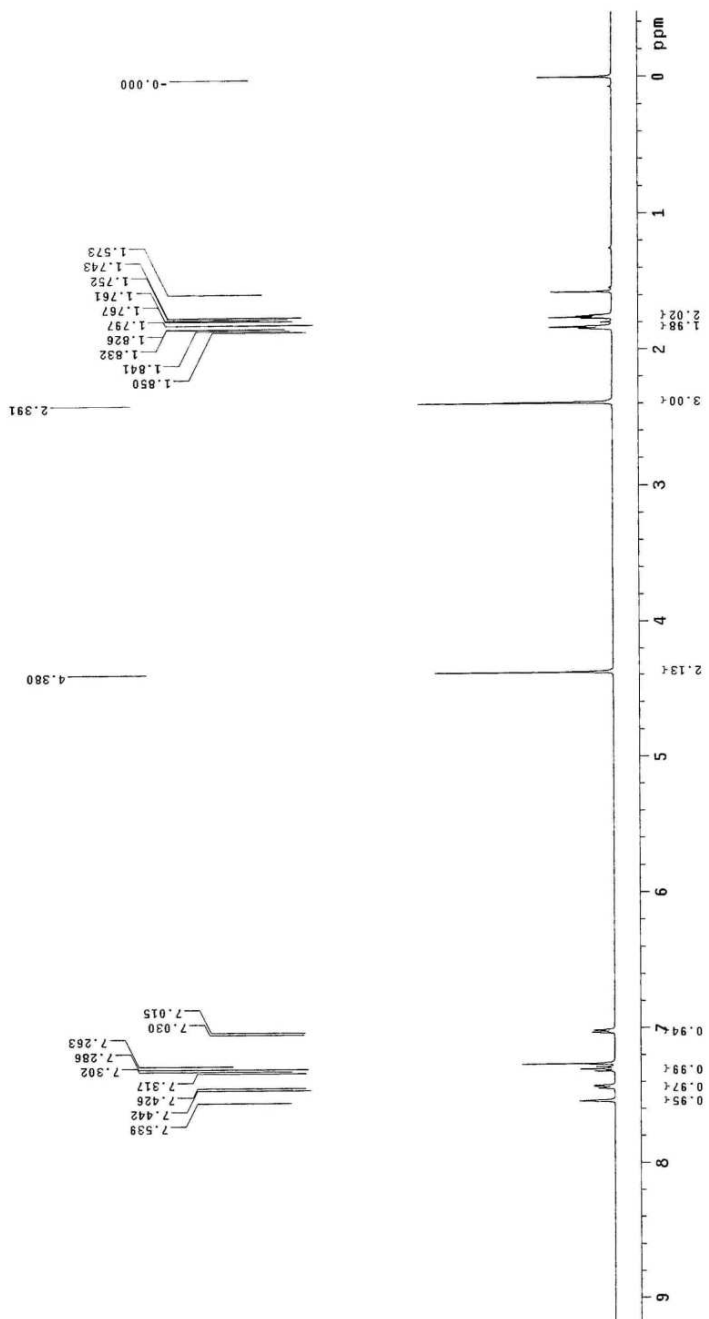

# Compound 2j

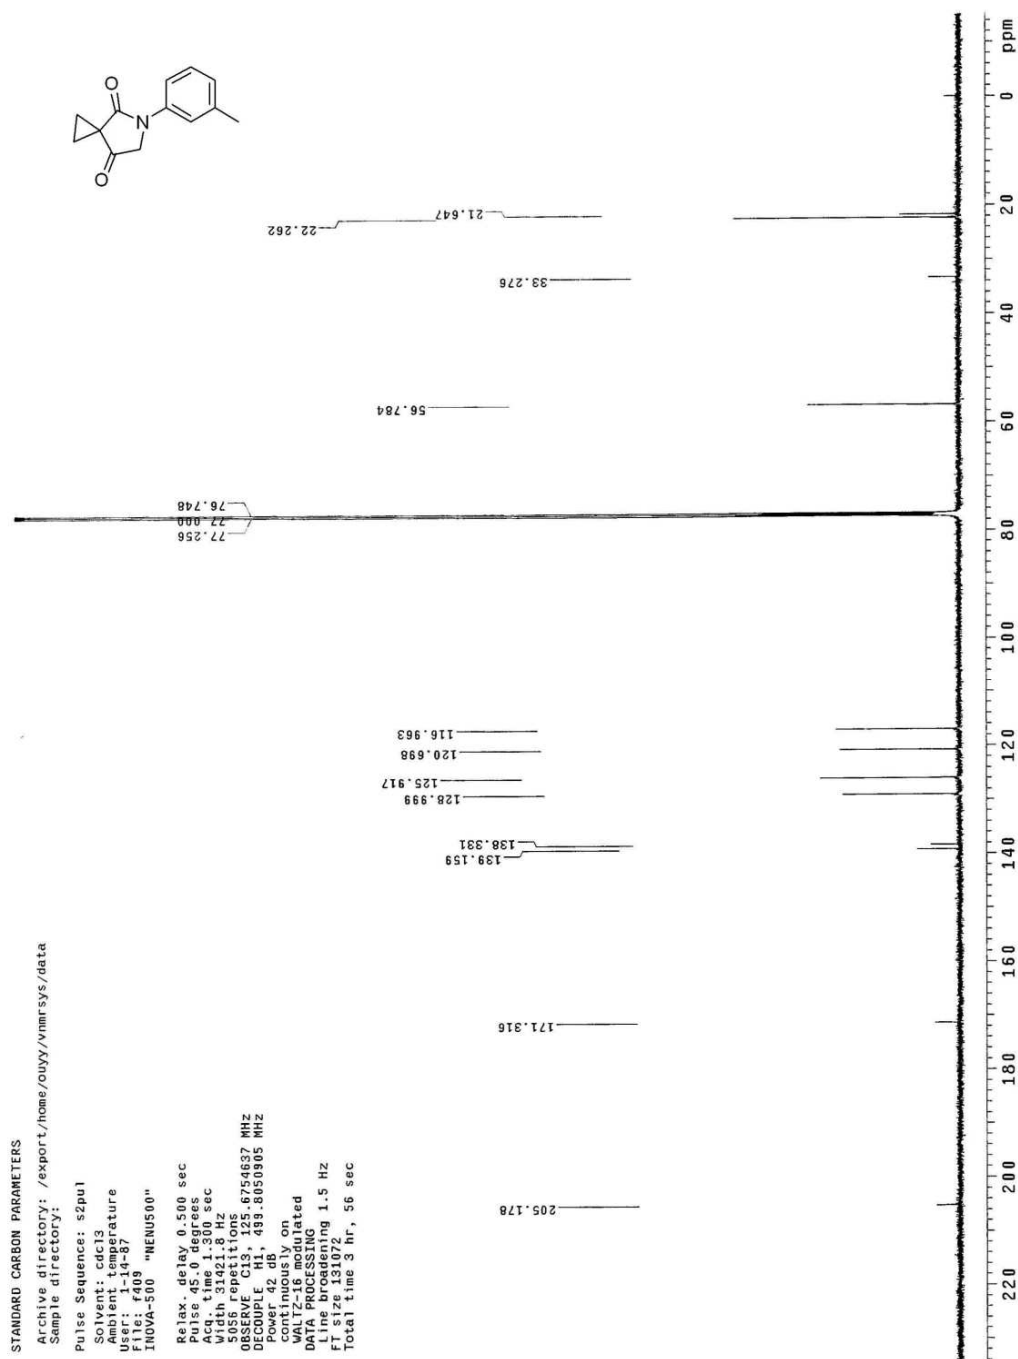

```

STANDARD PROTON PARAMETERS
Archive directory: /export
Sample directory:
Pulse Sequence: s2pu1
Solvent: CDCl3
Ambient temperature:
File: k331
INVOA=500 "NMR500"
Relax delay 1.000 sec
Pulse width 0.000 sec
Acq. time 1.892 sec
Width 8400.6 Hz
Sweep rate 100.000 Hz
Repetitions 89.802514
DATA PROCESSING
File size 85536
Total time 0 min, 23 sec

```

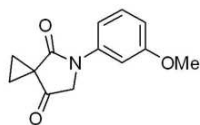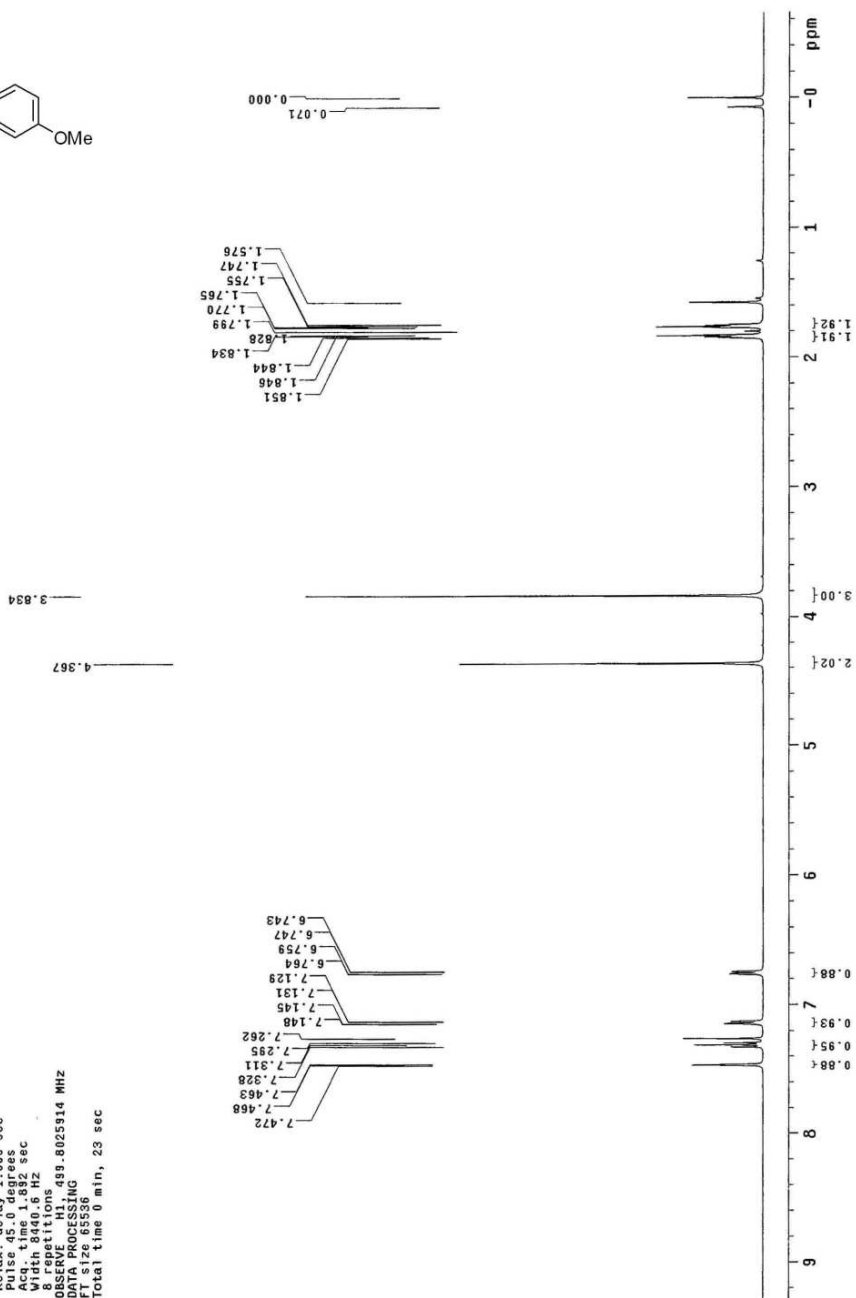

# Compound 2k

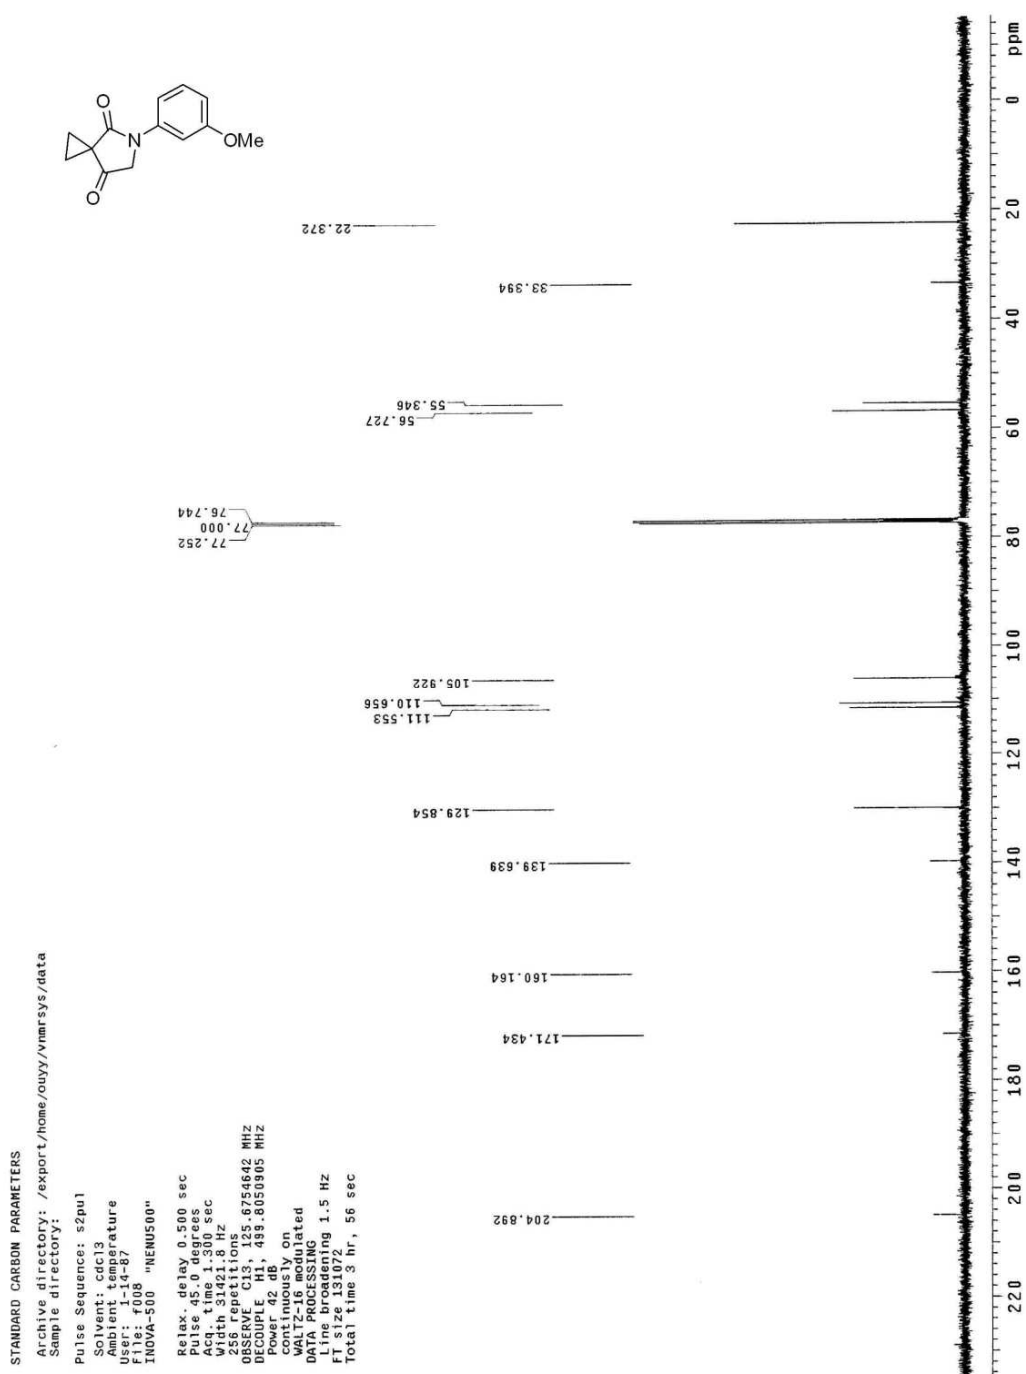

# Compound 21

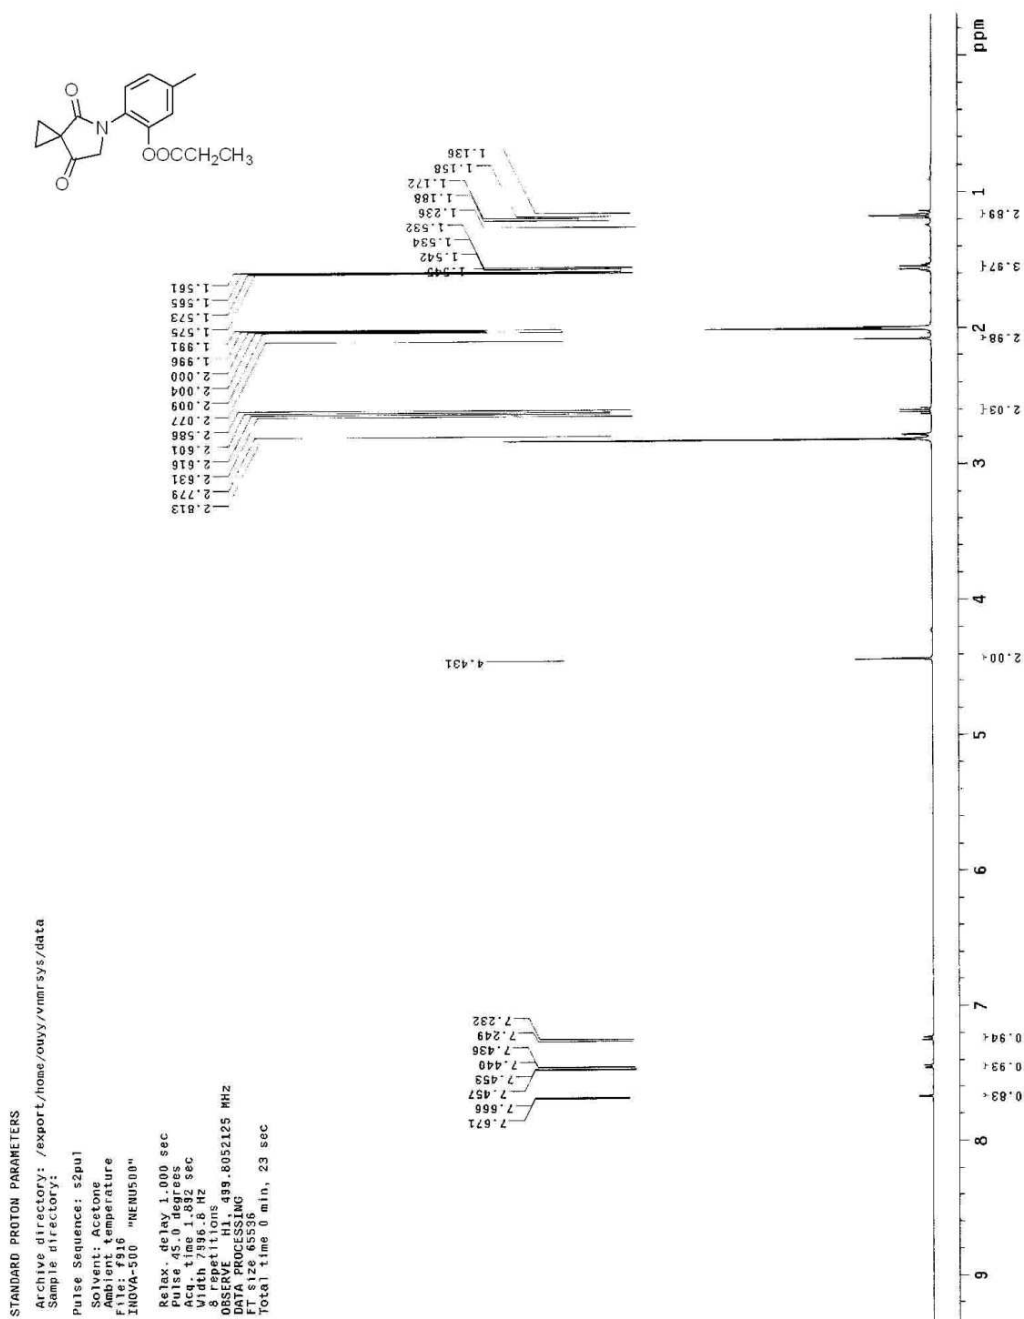

CCOC(=O)c1ccc(cc1)N2C(=O)C3CC3C(=O)N2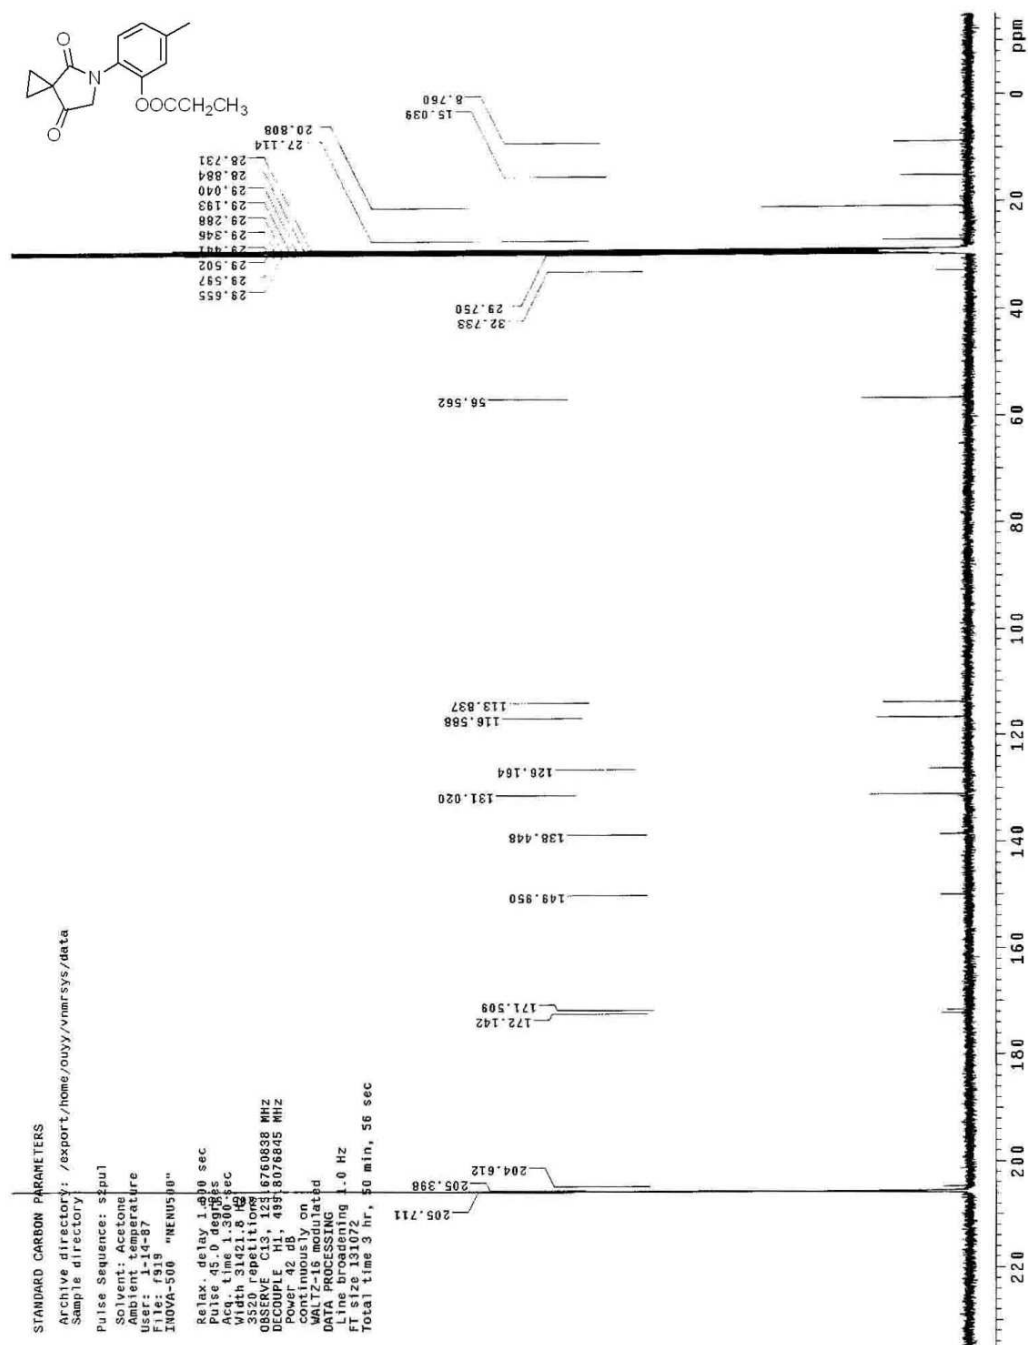

# Compound 2o

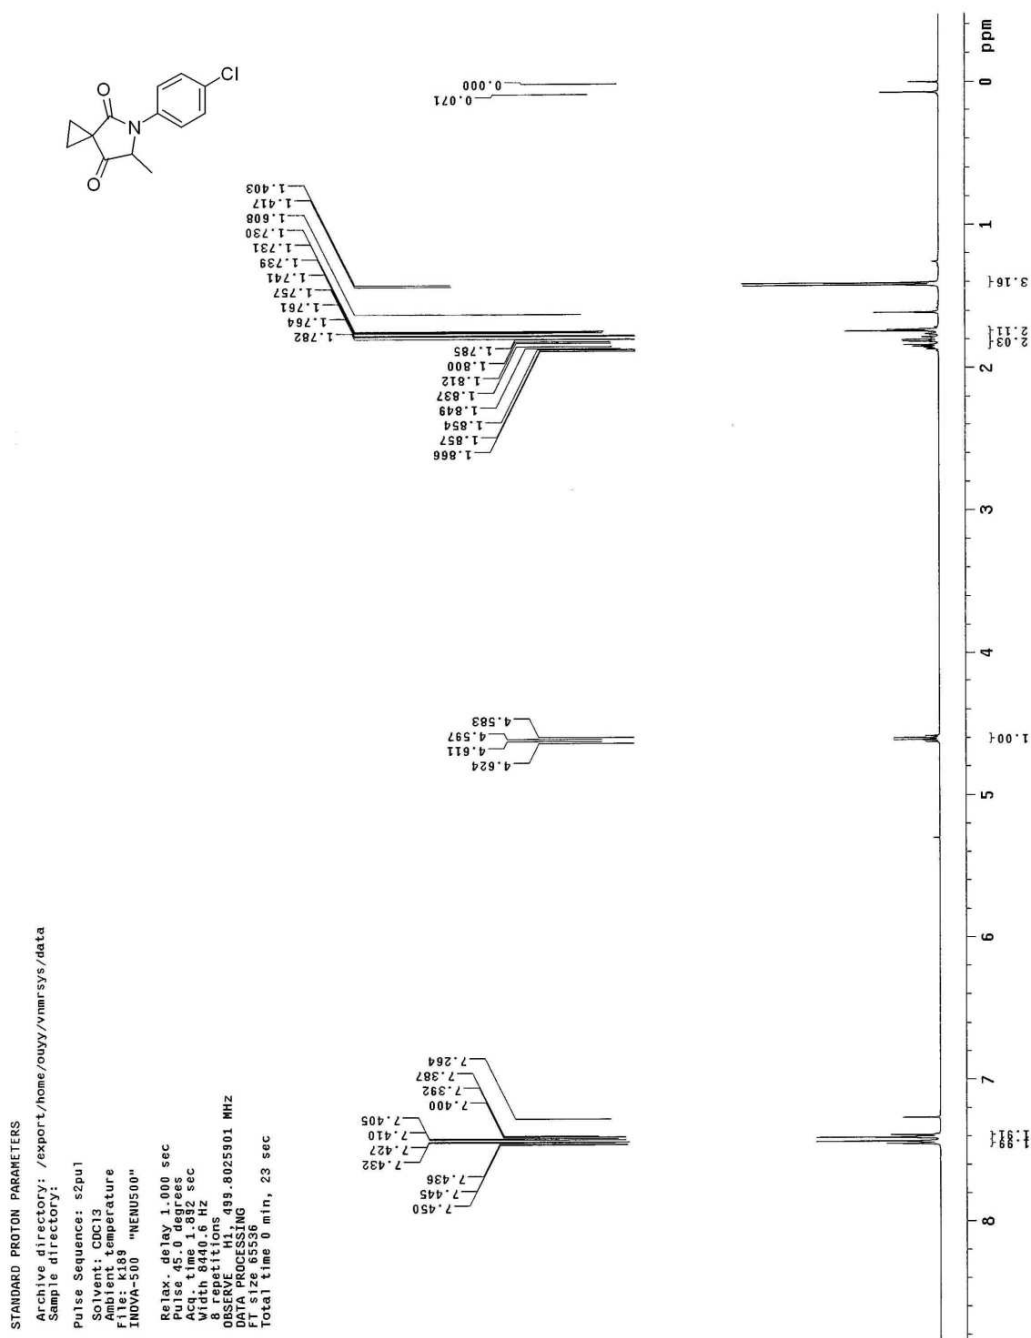

# Compound 2o

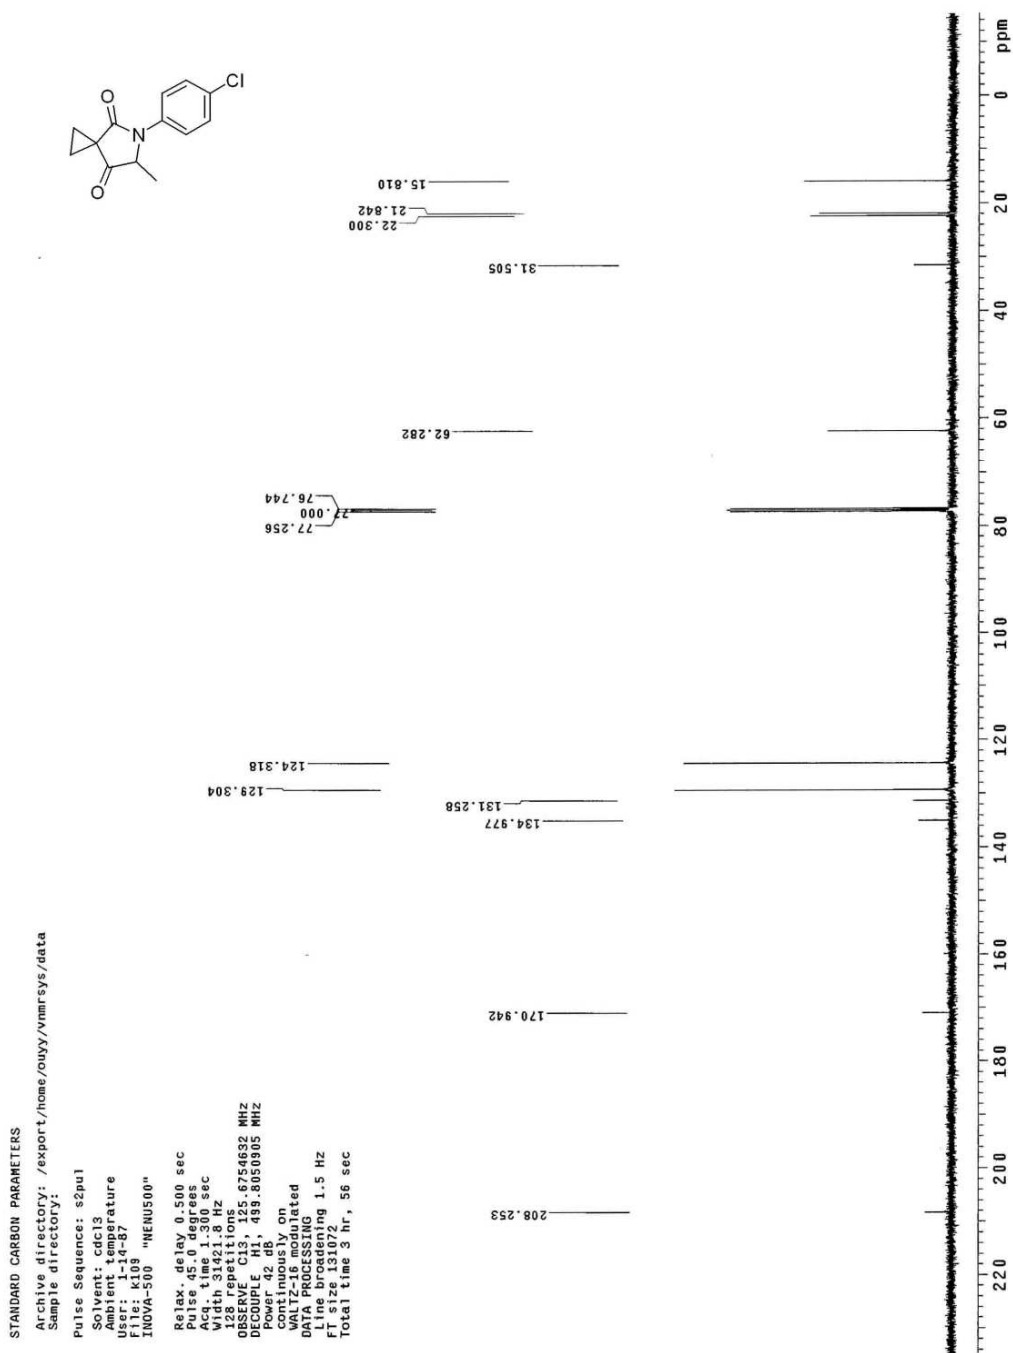



# Compound 2p

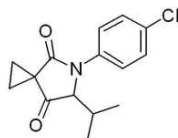

STANDARD CARBON PARAMETERS  
Archive directory: /export/home/ouss/vnmr/sys/data  
Sample directory:

Pulse Sequence: s2pul  
Solvent: cdcl3  
Ambient temperature  
User: k832  
File: k832  
INOVA-500 "MENU500"

Relax. delay 0.500 sec  
Pulse 45.0 degrees  
Acq. time 0.500 sec  
Width 31421.8 Hz  
4928 repetitions  
OBSERVE C13, 125.6754618 MHz  
DECOUPLE H1, 499.8050305 MHz  
Pwr 42 db  
continuously on  
WALTZ-16 modulated  
DATA PROCESSING  
1.5 Hz  
FT size 131072  
Total time 3 hr, 56 sec

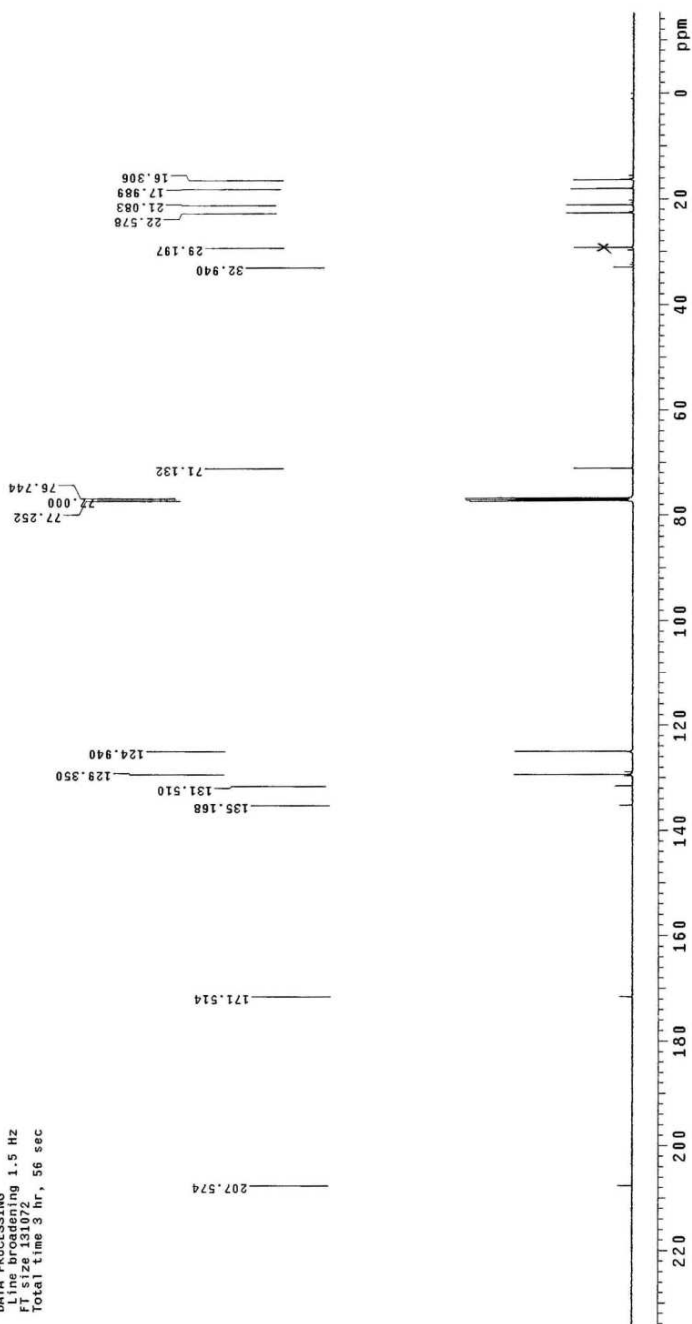

# Compound 2s

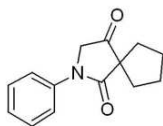

## STANDARD PROTON PARAMETERS

Archive directory: /export/home/ouyy/vmrsys/data

Sample directory:

Pulse Sequence: s2pul

Solvent: CDCl3

Ambient temperature

File: v856

INOVA-500 "MNU500"

Relax. delay 1.000 sec

Pulse 45.0 degrees

Acq. time 1.892 sec

Width 8291.0 Hz

Observed time 1.892 sec

OBSERVED F1 499.8025902 MHZ

DATA PROCESSING

FT size 65536

Total time 0 min, 23 sec

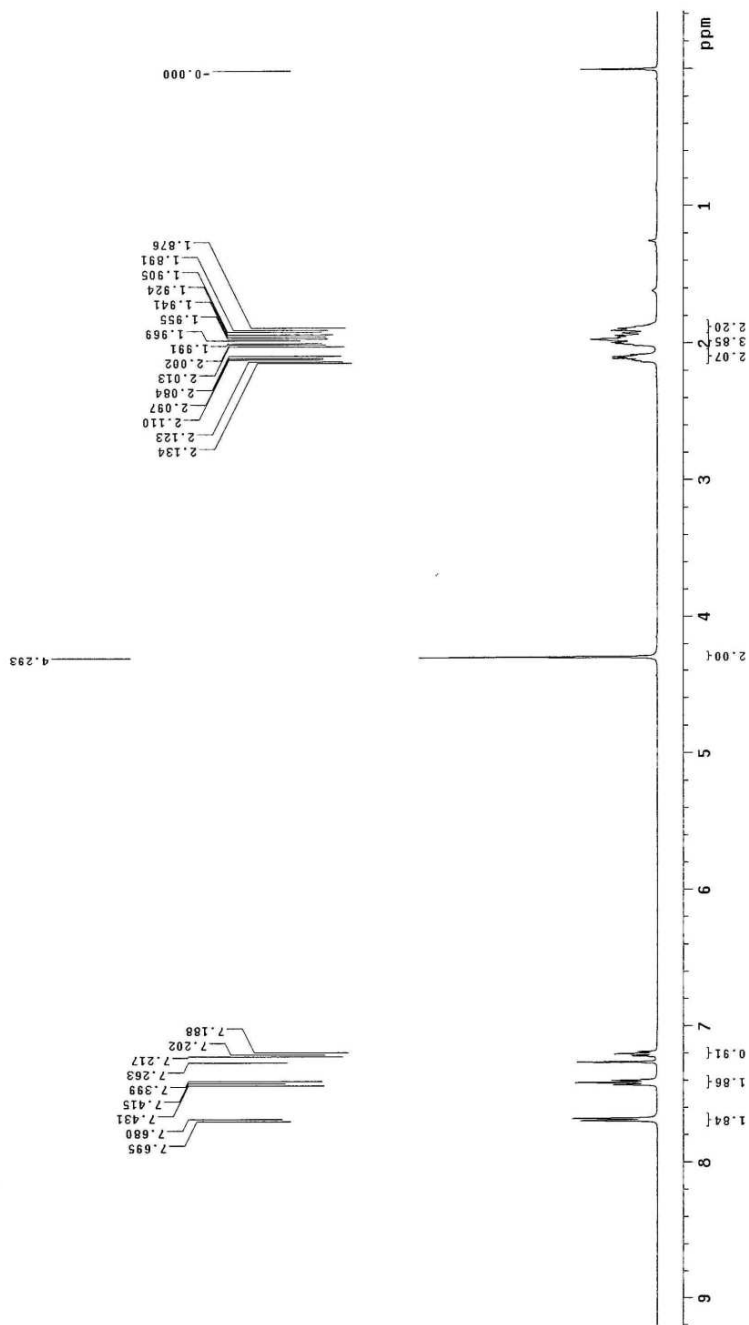

# Compound 2s

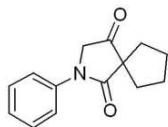

## STANDARD CARBON PARAMETERS

Archive directory: /export/home/ouy/vnmrSYS/data  
Sample directory:

Pulse Sequence: s2pul  
Solvent: CDCl3  
Ambient temperature  
Date: 02-14-07  
File: v857  
INOVA-500 "NMR500"

Relax. delay 0.500 sec  
Pulse 45.0 degrees  
Acq. time 1.500 hr  
Width 31921.8 Hz  
128 repetitions  
OBSERVE C13, 125.6754646 MHz  
DECOUPLE H1, 499.8050905 MHz  
Power 12.0 dB  
P1 12.0 dB  
WALTZ-16 modulated  
DATA PROCESSING  
Line broadening 1.5 Hz  
F1 size 131072  
Total time 2 hr, 3 min, 31 sec

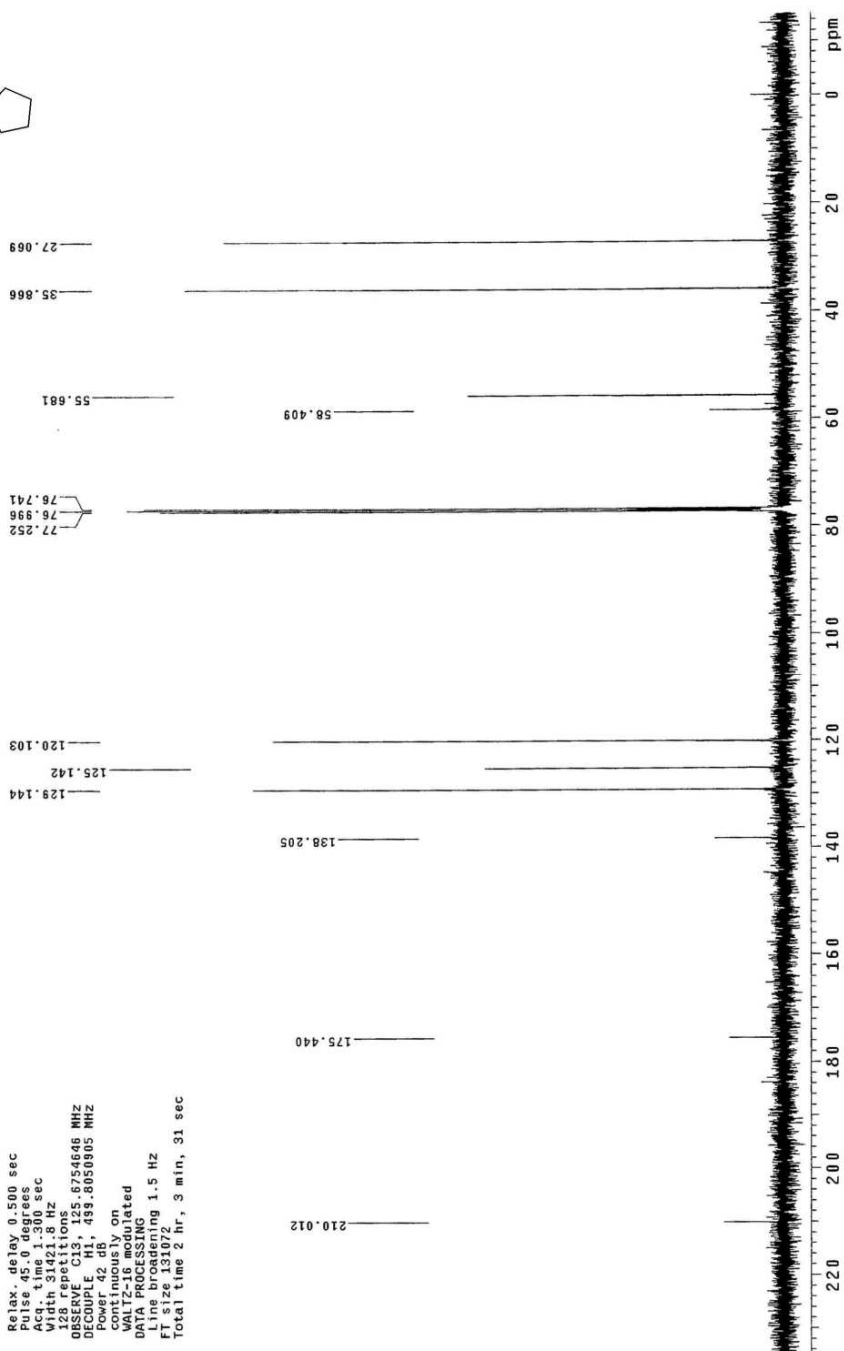

# Compound 2t

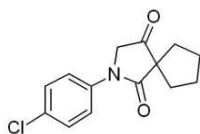

STANDARD PROTON PARAMETERS  
 Archive directory: /export/home/ouyy/vnmrSYS/data  
 Sample directory:  
 Pulse Sequence: s2p01  
 Solvent: CDCl3  
 Ambient temperature  
 File: p108  
 INOVA-500 "MENU500"  
 Relax. delay 1.000 sec  
 Pulse 45.0 degrees  
 Acq. time 1.892 sec  
 Width 8889.8 Hz  
 Spectroscopy  
 Frequency 499.8025862 MHz  
 DATA PROCESSING  
 FT size 65536  
 Total time 0 min, 23 sec

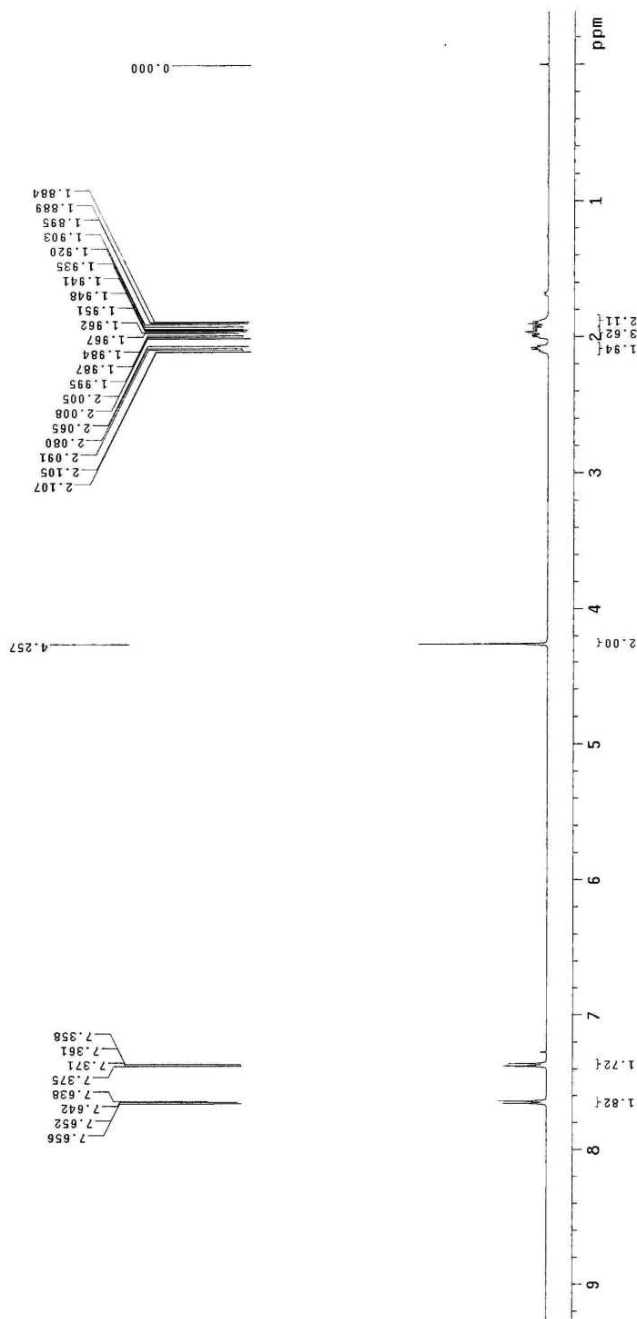



# Compound 2u

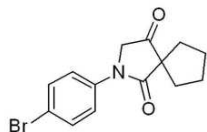

STANDARD PROTON PARAMETERS  
 Archive directory: /export/home/ouyy/vnmrsws/data  
 Sample directory:  
 Pulse Sequence: s2pul  
 Solvent: CDCl3  
 Ambient temperature  
 File: d893  
 INOVA-500 "NMR500"  
 Relax. delay 1.000 sec  
 Pulse 45.0 degrees  
 Acq. time 1.892 sec  
 Width 8578.2 Hz  
 Spectrometer  
 OBSERVE H1 499.8025891 MHz  
 DATA PROCESSING  
 FT size 65536  
 Total time 0 min, 23 sec

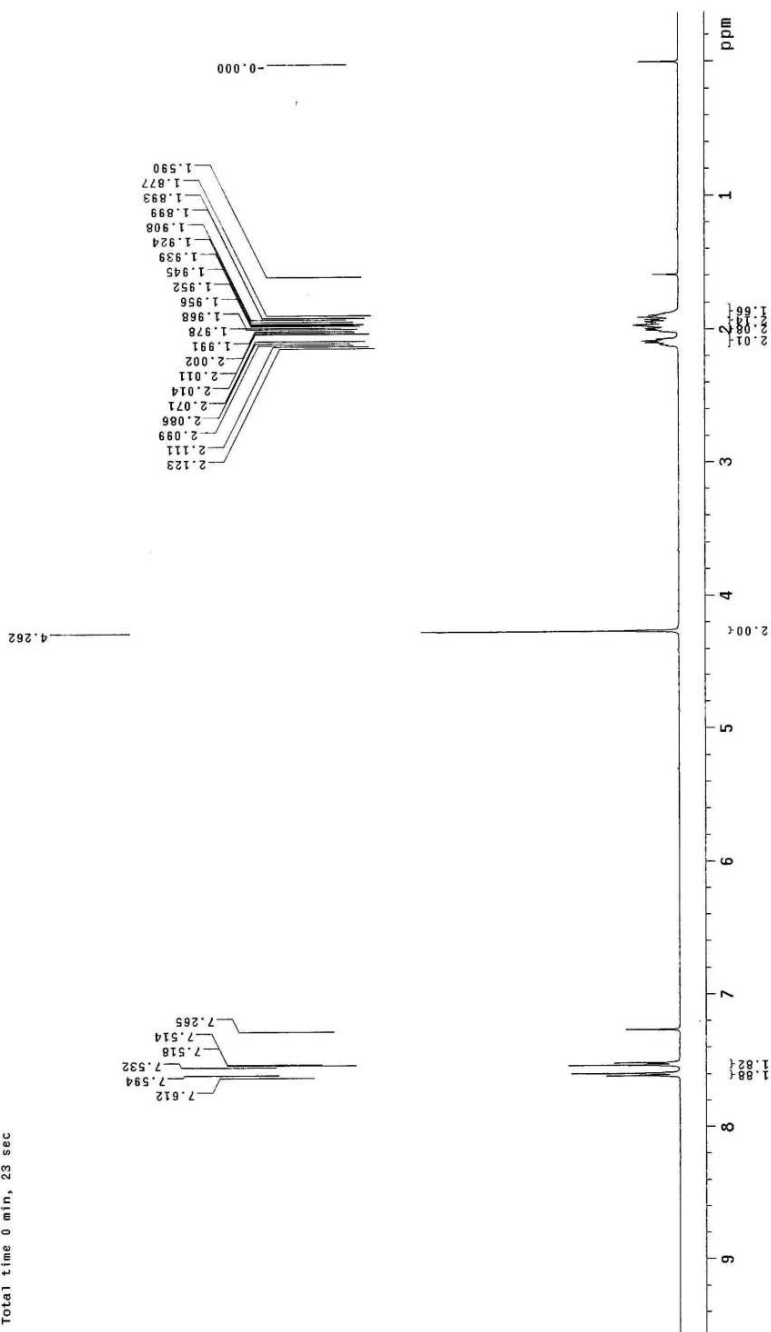

# Compound 2u

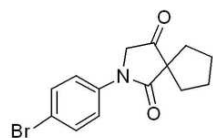

## STANDARD CARBON PARAMETERS

Archive directory: /export/home/ouyy/vnmrfsys/data  
Sample directory:

Pulse Sequence: s2pul

Solvent: cdcl3

Ambient temperature

User: 1-14-87

File: d834

INOVA-500 "MNU500"

Relax. delay 0.500 sec

Pulse delay 0.000 sec

Acq time 1.300 sec

Width 31421.8 Hz

3392 repetitions

Observed C13, 125.6754656 MHz

Observed H1, 400.1463400 MHz

Power 42 dB, 433.8058905 MHz

continuously on

WALTZ-16 modulated

DATA PROCESSING

Line broadening 1.5 Hz

FT size 131072

Total time 3 hr, 56 sec

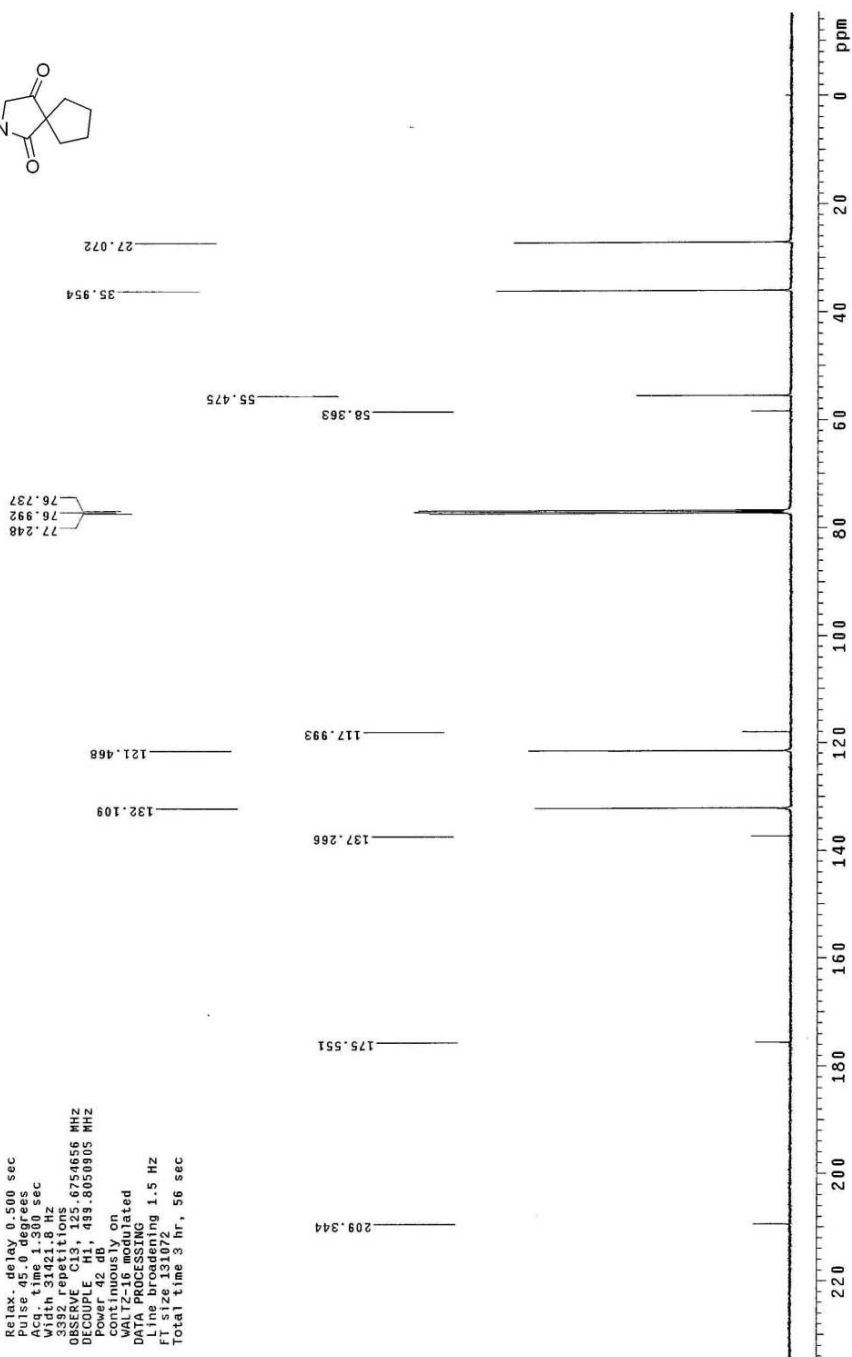

Supplement: Supplementary file 1 [file 4093561]
